1 **Gene expression signatures identify pediatric patients with multiple**  
2 **organ dysfunction who require advanced life support in the intensive**  
3 **care unit**

4 **Running title:** Transcriptional signature for multiple organ dysfunction  
5 syndrome trajectory

6  
7 Rama Shankar ([ramashan@msu.edu](mailto:ramashan@msu.edu))<sup>1,2</sup>, Mara L. Leimanis  
8 ([Mara.Leimanis@spectrumhealth.org](mailto:Mara.Leimanis@spectrumhealth.org))<sup>1,3</sup>, Patrick A. Newbury ([rnewbury@gmail.com](mailto:rnewbury@gmail.com))<sup>1,2</sup>, Ke Liu  
9 ([liuke2@msu.edu](mailto:liuke2@msu.edu))<sup>1,2</sup>, Jing Xing ([xingjin1@msu.edu](mailto:xingjin1@msu.edu))<sup>1,2</sup>, Derek Nedveck  
10 ([dnedveck@gmail.com](mailto:dnedveck@gmail.com))<sup>4</sup>, Eric J. Kort ([eric.kort@helendevoschildrens.org](mailto:eric.kort@helendevoschildrens.org))<sup>1,5,6</sup>, Jeremy W  
11 Prokop ([prokopje@msu.edu](mailto:prokopje@msu.edu))<sup>1,2</sup>, Guoli Zhou ([zhoug@msu.edu](mailto:zhoug@msu.edu))<sup>7</sup>, André S Bachmann  
12 ([bachma26@msu.edu](mailto:bachma26@msu.edu))<sup>1</sup>, Bin Chen ([chenbi12@msu.edu](mailto:chenbi12@msu.edu))<sup>1,2\*</sup>, Surender Rajasekaran  
13 ([surender.rajasekaran@spectrumhealth.org](mailto:surender.rajasekaran@spectrumhealth.org))<sup>1,3,4\*</sup>

14  
15  
16 **1** Department of Pediatrics and Human Development, College of Human Medicine, Michigan State  
17 University, Grand Rapids, MI 49503, USA  
18 **2** Department of Pharmacology and Toxicology, College of Human Medicine, Michigan State University,  
19 Grand Rapids, MI 49503, USA  
20 **3** Pediatric Intensive Care Unit, Helen DeVos Children's Hospital, 100 Michigan Street NE, Grand Rapids,  
21 MI, 49503, USA  
22 **4** Office of Research, Spectrum Health, 15 Michigan Street NE, Grand Rapids, MI 49503, USA  
23 **5** DeVos Cardiovascular Program, Van Andel Research Institute and Fredrik Meijer Heart and Vascular  
24 Institute/Spectrum Health, Grand Rapids, MI 49503, USA  
25 **6** Pediatric Hospitalist Medicine, Helen DeVos Children's Hospital, 100 Michigan Street NE, Grand Rapids,  
26 MI, 49503, USA  
27 **7** Biomedical Research Informatics Core (BRIC), Clinical and Translational Sciences Institute (CTSI),  
28 Michigan State University, East Lansing, MI 48824, USA

29  
30 \* Correspondence: Dr. Bin Chen ([chenbi12@msu.edu](mailto:chenbi12@msu.edu)) and Dr. Surender Rajasekaran  
31 ([surender.rajasekaran@spectrumhealth.org](mailto:surender.rajasekaran@spectrumhealth.org))

32

## 33 **Abstract**

34 **Background:** Multiple organ dysfunction syndrome (MODS) occurs in the setting of a  
35 variety of pathologies including infection and trauma. Some of these patients will further  
36 decompensate and require extra corporeal membrane oxygenation (ECMO) as a  
37 palliating maneuver to allow time for recovery of cardiopulmonary function. The  
38 molecular mechanisms driving progression from MODS to cardiopulmonary collapse  
39 remain incompletely understood, and no biomarkers have been defined to identify those  
40 MODS patients at highest risk for progression to requiring ECMO support. We  
41 hypothesize that molecular features derived from whole blood transcriptomic profiling  
42 either alone or in combination with traditional clinical and laboratory markers can  
43 prospectively identify these high risk MODS patients in the pediatric intensive care unit  
44 (PICU).

45

46 **Design/Methods:** Whole blood RNA-seq profiling was performed for 23 MODS patients  
47 at three time points during their ICU stay (at diagnosis of MODS, 72 hours after, and 8  
48 days later), as well as four healthy controls undergoing routine sedation. Of the 23  
49 MODS patients, six required ECMO support (ECMO patients). The predictive power of  
50 conventional demographic and clinical features was quantified for differentiating the  
51 MODS and ECMO patients. We then compared the performance of markers derived  
52 from transcriptomic profiling including (1) transcriptomically imputed leukocyte subtype  
53 distribution, (2) relevant published gene signatures and (3) a novel differential gene  
54 expression signature computed from our data set. The predictive power of our novel  
55 gene expression signature was then validated using independently published datasets.

56 **Results:** None of the five demographic characteristics and 14 clinical features, including  
57 The Pediatric Logistic Organ Dysfunction (PELOD) score, could predict deterioration of  
58 MODS to ECMO at baseline. From previously published sepsis signatures, only the  
59 signatures positively associated with patients mortality could differentiate ECMO  
60 patients from MODS patients, when applied to our transcriptomic dataset ( $P$ -value  
61 ranges from 0.01 to 0.04). Deconvolution of bulk RNA-Seq samples suggested that  
62 lower neutrophil counts were associated with increased risk of progression from MODS  
63 to ECMO ( $P$ -value = 0.03, OR=2.82 [95% CI 0.63– 12.45]). A total of 28 genes were  
64 differentially expressed between ECMO and MODS patients at baseline ( $\log_2$  fold  
65 change  $\geq 1$  or  $\leq -1$  with false discovery rate  $\leq 0.2$ ). These genes are involved in protein  
66 maintenance and epigenetic-related processes. Further univariate analysis of these 28  
67 genes suggested a signature of six DE genes associated with ECMO (OR > 3.0,  $P$ -  
68 value  $\leq 0.05$ ). Notably, this contains a set of histone marker genes, including *H1F0*,  
69 *HIST2H3C*, *HIST1H2AI*, *HIST1H4*, and *HIST1H1B*, that were highly expressed in  
70 ECMO. A risk score derived from expression of these genes differentiated ECMO and  
71 MODS patients in our dataset (AUC = 0.91, 95% CI 0.79-0.1.00,  $P$ -value = 7e-04) as  
72 well as validation dataset (AUC= 0.73,95% CI 0.53-0.93,  $P$ -value = 2e-02).

73  
74 **Conclusions:** This study identified lower neutrophils and upregulation of specific  
75 histone related genes as a putative signature for deterioration of MODS to ECMO. This  
76 study demonstrates that transcriptomic features may be superior to traditional clinical  
77 methods of ascertaining severity in patients with MODS.

78

## 79 **Author summary**

### 80 **Why was this study done?**

- 81 ● Multiple organ dysfunction syndrome (MODS) is a major cause of mortality and  
82 morbidity in critically ill pediatric patients who survive the initial physical insult.
- 83 ● A variety of triggers including trauma and infections can lead to MODS in  
84 pediatric patients.
- 85 ● The clinical condition of some MODS patients improve while others deteriorate,  
86 needing resource-intensive life support such as extracorporeal membrane  
87 oxygenation (ECMO).
- 88 ● Mortality is uncommon in PICUs and the need for advanced life support devices,  
89 such as ECMO can serve as proxy for mortality.
- 90 ● The decision to initiate ECMO in pediatric patients is often subjective made by a  
91 committee of physicians that include surgeons, intensivists and a variety of other  
92 subspecialists often in the absence of objective data.
- 93 ● Despite decades of research, no diagnostic criteria or biomarker has been  
94 identified that comprehensively assesses severity in MODS patients who may  
95 need subsequent ECMO support in the hyperacute phase of injury.
- 96 ● We systematically assessed clinical and transcriptional features as biomarkers  
97 for the prediction of the ECMO patients.

98

### 99 **What did the researcher do and find?**

- 100 ● We investigated various clinical and transcriptional features in 27 patients with  
101 MODS at multiple time points (4 CT, 17 MODS, 6 ECMO) at baseline (0h).

- 102 ● We observed that immune response pathways (monocytes, cytokines, NF-kB,  
103 and inflammation) were activated in the initiation of MODS, whereas neutrophil  
104 level was decreased during deterioration of MODS to ECMO.
- 105 ● A total of 51 DE genes were identified in MODS compared to CT and 28 DE in  
106 ECMO compared to MODS at baseline (0h).
- 107 ● We identified the enrichment of immune-related and glycogenolysis processes in  
108 MODS compared to CT and enrichment of protein maintenance, DNA repair and  
109 epigenetic-related processes in ECMO compared to MODS at baseline (0h).
- 110 ● Logistic regression was used to identify a signature of 6 genes strongly  
111 associated with ECMO decision and this signature could help to diagnose MODS  
112 patients requiring ECMO.
- 113 ● The transcriptomic signature-based risk scores were further evaluated in an  
114 independent cohort.

115

### 116 **What do these findings mean?**

- 117 ● The compromised level of neutrophils and activation of gene markers including a  
118 few histone genes could be used as putative signature for diagnosing the  
119 deterioration of MODS to ECMO.
- 120 ● A risk score derived from signature genes could be used to predict the need for  
121 ECMO.
- 122 ● This score is superior to traditional clinical criteria and severity scores used in the  
123 Pediatric ICU.

- 124       • The transcriptional signature derived in this study could potentially be used to  
125       identify patients in the hyperacute phase of injury that may need higher levels of  
126       support like ECMO enabling the selection of an appropriate treatment plan.

127

128   **Abbreviation:** Multiple organ dysfunction syndrome, MODS; Extracorporeal Membrane  
129   Oxygenation, ECMO; patients did not develop MODS, no-MODS; pediatric intensive  
130   care unit, PICU; Differentially expressed, DE; False discovery rate, FDR; Area under  
131   curve, AUC; principal component analysis, PCA; Odds ratio, OR.

132

## 133   **Introduction**

134   Multiple organ dysfunction syndrome (MODS) is common in the pediatric intensive care  
135   unit (PICU), being diagnosed in the majority of patients with sepsis as well as many  
136   trauma patients [1]. MODS complicates a wide range of pathologies including severe  
137   hypoxemia, cardiorespiratory arrest, shock, trauma, acute pancreatitis, gut  
138   malperfusion, acute leukemia, solid organ or hematopoietic stem cell transplantation,  
139   hemophagocytic lymphohistiocytosis, and thrombotic microangiopathy [2].  
140   Contemporary management of MODS is entirely supportive, and focused on addressing  
141   the underlying disease process.

142       Some pediatric patients who develop MODS deteriorate and require intensive life  
143   support in the form of Extracorporeal Membrane Oxygenation (ECMO). It has been  
144   observed that pediatric patients requiring ECMO have a 50-60% mortality rate [3]. The  
145   decision to initiate ECMO remains subjective based on the empirical experience of the  
146   multidisciplinary care team. Establishment of objective markers of what patients will

147 require ECMO support would simplify the decision making process and potentially  
148 enable earlier intervention for these patients. However, no clinical scoring tool or  
149 molecular biomarker has been developed to identify the patients who may require  
150 subsequent advanced support; therefore, developing biomarkers for identifying MODS  
151 patients at high risk of requiring ECMO support is a critical unmet need.

152 Whole blood transcriptomic profiling has been evaluated to perform risk-  
153 stratification of sepsis patients, predict mortality in sepsis and better understand the  
154 pathogenesis of MODS [4]. A number of published gene expression signatures shed  
155 light on the molecular mechanism of MODS [5,6]. However, none of the signatures were  
156 developed with a view towards identifying patients that require ECMO support.

157 In this work, we present a cohort of MODS patients, a subset of whom  
158 progressed to requiring ECMO support (MODS vs ECMO) and healthy controls (CT).  
159 Here we use the term MODS to denote those MODS patients that did not require ECMO  
160 and ECMO for MODS patients deteriorated to needing ECMO support. These patients  
161 were assessed using a combination of conventional demographic and clinical markers,  
162 as well as whole blood transcriptomic profiling in an effort to identify diagnostic markers  
163 that can distinguish between the MODS and ECMO patient population.

164

## 165 **Methods**

### 166 **Patients and blood sampling**

167 The IRB of this study (2016-062-SH/HDVCH) was approved by Spectrum Health on  
168 May 17, 2016. All the patients were minors and their parents were consented prior to  
169 recruitment into our study. Every parent gave consent. After IRB approval, a short-term

170 longitudinal design was adopted to assess the transcriptomic profiles of patients from  
171 the PICU at Helen DeVos Children's Hospital, Michigan. Critically ill patients, meeting  
172 criteria for MODS as determined by clinical observations, were screened for eligibility  
173 and consented. Blood samples were collected at three time points: at recognition of  
174 MODS (0h), 72 hours after, and 8 days later (N=27). Samples were collected in  
175 PaxGene® tubes and stored at -80°C. Healthy controls (N=4) were patients that  
176 presented for same day sedation. Samples from each control patient were obtained only  
177 once and were reported as 0h. Of the 23 MODS patients, 6 required ECMO support.  
178 From admission to day 8, 47% of the MODS patients were discharged to home or out of  
179 the ICU to a medical floor. Patients who left the ICU did not have further blood draws.  
180 One patient from the ECMO group died during the study and two other MODS patients  
181 died six months later.

182

### 183 **Sequencing**

184 RNA samples were prepared using KAPA RNA HyperPrep Kit, and sequenced on  
185 an Illumina NextSeq500. Using ribosomal reduction RNAseq methodology, we were able  
186 to capture both cellular and acellular RNA signatures of all PICU patients.

187

### 188 **Validation Data Sets**

189 For validation, we were unable to identify any analogous publicly available gene  
190 expression datasets that included pediatric MODS patients at multiple time points. We  
191 therefore chose a dataset describing an adult cohort (23-63 years) developed MODS in  
192 the hyperacute phase of trauma [7]. This dataset was used as an independent cohort to



193 validate our signature genes. The MODS patients in this validation dataset were  
194 categorized into MODS and noMODS (patients did not develop MODS) as described in  
195 patient demographics [7]. In addition, a single cell RNA-Seq dataset was also available  
196 for adult ECMO patients [8]. We used the immune cell markers from this dataset to  
197 validate our immune response analysis.

198

## 199 **Bioinformatics analysis**

200 **RNA-Seq data analysis.** All the sequencing reads were mapped on Hg38  
201 transcriptome using the ENSEMBL GRCh38.p3 annotation with the STAR aligner [9].  
202 The edgeR package [10] was used for quantification of differentially expressed (DE)  
203 genes with criteria:  $\log_2$  fold change  $\geq 1$  or  $\leq -1$  with adjusted *P*-value (False Discover  
204 Rate)  $< 0.20$ . DE genes were identified between the two groups in all the three-time  
205 points separately. The DE genes were used for co-expression network analysis using  
206 CEMiTools package [11]. The gene ontology (GO) enrichment of DE genes was  
207 performed using the clusterProfiler R package [12]. Biological processes with adjusted  
208 *P*-value  $\leq 0.01$  were considered as significantly enriched. Dotplot function provided in  
209 clusterProfiler was used to visualize enriched pathways. In addition, gene interaction  
210 network was visualized using STRING: functional protein association network  
211 (<https://string-db.org/>).

212

213 **Immune Cell Deconvolution.** CIBERSORT was used to estimate the relative  
214 composition of immune cells in bulk RNA-Seq samples [13] using a machine learning  
215 model named as nu-support vector regression (*v*-SVR) [14]. For each patient, a

216 complete blood count (CBC) was obtained upon presentation as part of their standard of  
217 care clinical evaluation. We were therefore able to calculate estimated absolute counts  
218 for each leukocyte subpopulation. This was done by multiplying the proportion for each  
219 subpopulation as determined by CIBERSORT to the total white blood cell count from  
220 the CBC. This analysis was validated by comparing the absolute neutrophil counts  
221 (ANC) as estimated by CIBERSORT with the ANC reported by the clinical laboratory.

222

## 223 **Statistical Analysis**

224 All plots and statistical analyses were carried out using R programming language  
225 (v3.5.1) (<https://www.r-project.org/>). By default, two-sided student's t-test was performed  
226 to compute the significance between two groups. The generalized linear model function  
227 (glm) was used to calculate odds ratio (OR). Principal component analysis (PCA) of  
228 gene expression profiles was performed using the prcomp function. The risk score was  
229 estimated using the signature gene expression for each patient based on the geometric  
230 mean. The geometric mean for  $x_1, x_2, \dots, x_n$  was calculated as follows:

$$231 \quad \left(\prod_{i=1}^n x_i\right)^{\frac{1}{n}} = \sqrt[n]{x_1 x_2 \dots x_n}$$

232 A risk score was further used to re-classify patients into two groups and receiver  
233 operating characteristic (ROC) and area under curve (AUC) were adopted to assess the  
234 performance using the pROC package [15].

235

## 236 **Results**

237 The workflow of the study is summarized in Fig. 1. Patient demographics and baseline  
238 clinical parameters are provided in Table 1, with 72h and 8 day values presented in

239 supplemental Table S1. In total, five demographic characteristics (i.e., age, gender,  
240 BMI, weight, height) and 14 different clinical features were examined for all patients.  
241 There was high variation between MODS and ECMO for many clinical parameters (e.g.  
242 platelet count), diluting the predictive power of these measures. Some outcomes  
243 differed significantly between MODS and ECMO, specifically the renal failure rate (89%  
244 in MODS and 100% in ECMO) and liver failure rate (30% in MODS and 50% in ECMO.  
245 However, no baseline demographic or clinical parameter, including PELOD score was  
246 predictive of progression from MODS to ECMO. This observation highlighted the need  
247 to explore molecular features for identifying risk markers.

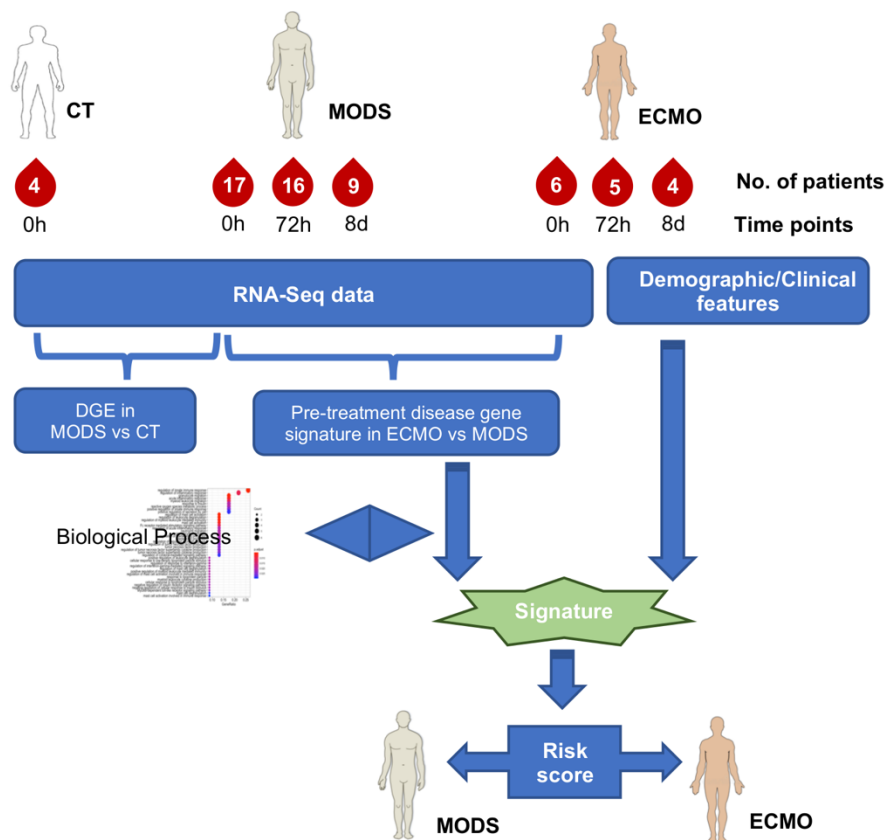

248

249

250

251 **Fig. 1 An overview of the analysis.** DGE: Differential gene expression.

252

253

254 **Table 1: Patients demographics at baseline (Pre-ECMO,0h) time point.**

255

| RNA-Seq cohort          |               |                 |                 |         |
|-------------------------|---------------|-----------------|-----------------|---------|
| Demographics            | Control       | MODS            | ECMO            | P-value |
| Time                    | 0h            | 0h              | 0h              | -       |
| Number                  | 4             | 17              | 6               | -       |
| Age (months)            | 84.75(28-122) | 90(0.14-202)    | 63.25(0.5-202)  | 0.54    |
| Male                    | 2             | 10              | 5               | 0.36    |
| Female                  | 2             | 7               | 1               | 0.36    |
| BMI                     | 17(14-21)     | 20.3(13-38.5)   | 19(14-32.4)     | 0.74    |
| Weight                  | 26.5(12-35)   | 42.85(3.5-178)  | 25.87(3.9-81)   | 0.35    |
| Height                  | 122(80-142)   | 103(51-157)     | 90(53-160)      | 0.59    |
| Mortality               | -             | 2               | 1               |         |
| Clinical Features       |               |                 |                 |         |
| Liver Failure (%)       | -             | 30              | 50              | -       |
| Bilirubin               | -             | 0.92(0.1-5.6)   | 0.51(0.1-1.1)   | 0.28    |
| AST                     | -             | 258.88(13-3296) | 215.67(7-726)   | 0.85    |
| Albumin                 | -             | 2.35(1.6-3.5)   | 2.35(1.9-2.8)   | 0.96    |
| CRP                     | -             | 83.75(0.3-234)  | 75.75(2.8-211)  | 0.87    |
| Renal Failure (%)       | -             | 89              | 100             | -       |
| Creatinine              | -             | 0.65(0.13-0.29) | 0.77(0.22-0.29) | 0.71    |
| Lactate                 | -             | 2.2(0.9-4.6)    | 6.05(0.6-14.5)  | 0.19    |
| WBC                     | -             | 14.9(3.95-62.6) | 12.67(4.6-20)   | 0.56    |
| platelet                | -             | 232(37-718)     | 208(92-378)     | 0.68    |
| PELOD Score             | -             | 14.37(1-32)     | 12.5(10-20)     | 0.21    |
| Bacterial infection (%) | -             | 35              | 33              |         |
| Viral infection (%)     | -             | 52              | 50              |         |
| Inotrope usage          |               | 88              | 100             |         |
| Respiratory failure (%) | -             | 100             | 100             |         |
| Neurological (%)        | -             | 23              | 33              |         |

Where relevant, mean(range). T-test and fisher's exact test was used to compute P-value between MODS and ECMO.

256

257

258 **Immune cells deconvolution and transcriptome analysis**

259 Immune responses were examined for individual patients and compared to elucidate  
260 their role. The relative proportions of immune cell subtypes were estimated using  
261 CIBERSORT based on bulk RNA-Seq data. WBC counts obtained upon arrival in the  
262 emergency department were used to quantify the absolute abundance of immune cell  
263 subtypes. The ANC as determined by the clinical laboratory and the ANC derived from  
264 CIBERSORT were high correlated (correlation value 0.97) (Figure S1), suggesting the  
265 high fidelity of the inferred leukocyte subtype composition. Comparison of neutrophils  
266 between ECMO and MODS showed decreased level in ECMO ( $P$ -value = 0.03,  
267 OR=2.82 [95% CI 0.63 – 12.45]) as compared to MODS (Fig. 2a). Interestingly, the two  
268 lowest neutrophil counts were among MODS. Clinical data of these two patients  
269 revealed that one patient did not survive and another had the PELOD score of 32, the  
270 highest score among all patients, suggesting that these patients had a risk profile similar  
271 to the ECMO patients despite not being started on ECMO.

272 We then examined the expression of marker genes of neutrophils (from  
273 CIBERSORT), monocytes, cytokines and genes involved in NF- $\kappa$ B and inflammatory  
274 response from Hall et al., 2007 [16]. All the marker genes were down-regulated in  
275 ECMO compared to MODS (Figure S2-S6). In addition to CIBERSORT, gene set  
276 enrichment analysis of cell-type specific biomarker genes was performed in order to  
277 confirm the findings. Neutrophil gene markers and genes involved in inflammatory  
278 response displayed significantly decreased expression in ECMO compared to MODS  
279 ( $P$ -value < 0.03) (Fig. 2b and 2c). Marker genes pertaining to monocytes, cytokines, and  
280 NF- $\kappa$ B displayed a significant enrichment in MODS compared to CT ( $P$ -value < 0.04)  
281 (Fig. 2d-2f).

282           The finding of changes in the neutrophil count was independently validated using  
283 additional single cell RNA-seq data of ECMO adult patients data [8], where we observed  
284 decrease of expression of neutrophil gene markers and genes involved in inflammatory  
285 response in deceased ECMO patients compared to patients that survived (Figure S7  
286 and S8). Further paired comparison of neutrophil levels for each patient showed no

287 significant change across different time points (Fig. 2g and 2h).

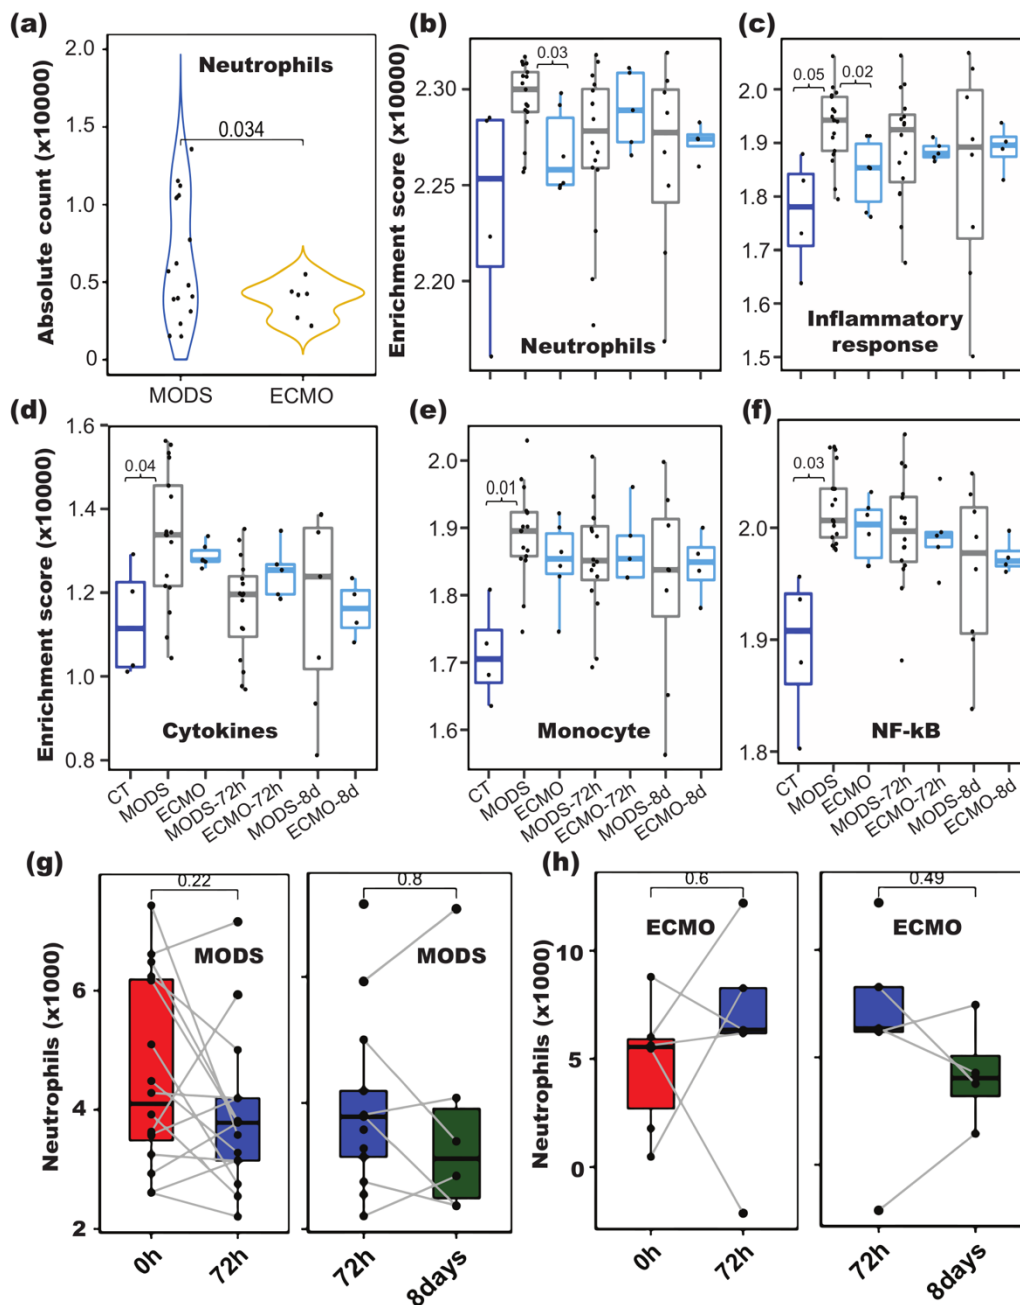

288

289 **Fig. 2 Immune cell composition analyses in ECMO and MODS patients.** (a) Neutrophils  
 290 counts computed from CIBERSORT decreased in ECMO ( $P = 0.034$ ) compared to MODS at  
 291 baseline. (b-f) Enrichment of genes involved in various immune responses (Monocytes,  
 292 Cytokines, NF-kB, Neutrophils and Inflammation) in CT, MODS and ECMO at different time  
 293 points (0h, 72h and 8d). Abundance of neutrophils in MODS (g) and ECMO (h) patients at

294 different time points (0h, 72h and 8days). Blue color - control (CT), grey color - MODS patients  
295 and cyan color - ECMO patients.  
296

297 Furthermore, differential expression (DE) analysis between MODS and control  
298 (CT) as well as between ECMO and MODS was performed at baseline (0h). A total of  
299 51 DE genes ( $\log_2$  fold change  $\geq 1$  or  $\leq -1$  with false discovery rate (FDR)  $\leq 0.2$ )  
300 between MODS and CT, and 28 DE genes between ECMO and MODS were identified  
301 at baseline (Fig. 3a). Comparison of DE genes from these two groups showed only one  
302 pseudogene ( RNU1-67P) common to these two DE lists. As expected, these DE genes  
303 clearly separate CT, MODS and ECMO patients (Fig. 3b and 3c) in reduced  
304 dimensional (PC) space. Heatmap visualization of these genes highlights their  
305 differential patterns of expression between groups (Fig. 3d).

306 In addition, 50 and 32 DE genes between MODS and CT were identified at 72h  
307 and 8d time points, respectively (Figure S9a), while 9 and 11 DE genes were identified  
308 between ECMO and MODS at 72h and 8d time points, respectively (Figure S9b). Only  
309 one gene (pseudogene- RNU1-67P) was common among all the three time points (0h,  
310 72h and 8d) in both comparisons.



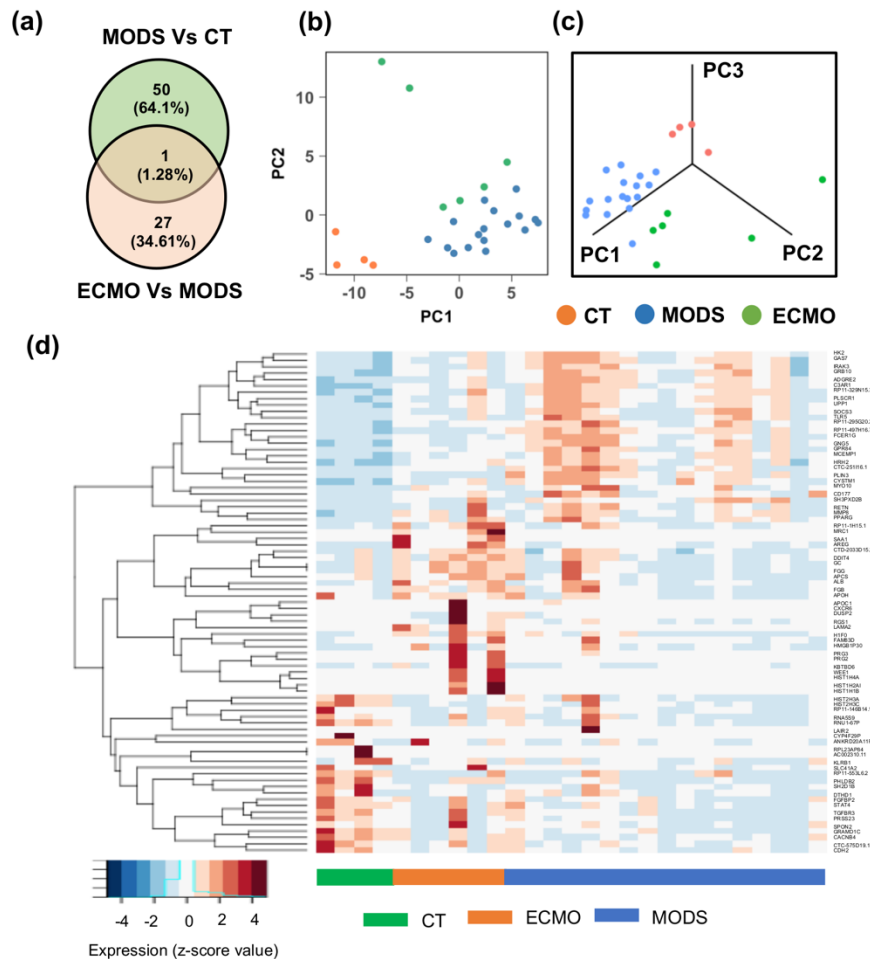

311

312 **Fig. 3 Differential gene expression analyses at baseline (0h).** (a) Comparison of differentially  
 313 expressed (DE) genes between MODS vs. control (CT), and ECMO vs. MODS at baseline (0h).  
 314 (b) First two principal components and (c) first three principal component analysis, using the  
 315 union of DE genes obtained from the comparison between MODS and CT and that those  
 316 between ECMO and MODS at baseline. Patients are clustered by their pathology group (CT,  
 317 MODS and ECMO). (d) Expression of the DE genes.

318

### 319 **Biological processes and co-expression networks regulated by DE genes**

320 Gene ontology (GO) enrichment analysis of total DE genes from MODS to CT  
 321 comparison revealed that immune-related (innate immune response, mast cell  
 322 activation, neutrophil migration, interleukin-6 production, and cytokine production) and

323 fatty acid-related pathways are enriched in MODS compared to CT (corrected  $P$ -value  $\leq$   
324 0.01, Fig. 4a) (Table S3). Notable genes included in immune responses are *ADGRE2*,  
325 *C3AR1*, *CD177*, *FCER1G*, *IRAK3*, *MMP8*, *PLSCR1*, *PPARG*, *SOCS3*, and *TLR5*.  
326 Similar pathways were also observed in a previous analysis between MODS and CT [5].  
327 In addition, gene expression related to epigenetic processes (e.g., regulation of gene  
328 silence, DNA packaging, chromatin assembly) was activated in ECMO compared to  
329 MODS (Fig. 4b and Table S4).

330 Further, co-expression analysis was performed to delineate the relationships  
331 between gene expression and their regulated pathways. The TPM count of all the genes  
332 for baseline patients was used to create co-expressed network modules. The DE genes  
333 from MODS to CT and ECMO to MODS were mapped on these modules and identified  
334 the corresponding modules. Two modules were identified in each comparison (Fig.4c  
335 and 4d). Notably, some of the DE genes from MODS to CT were mapped on module  
336 M15 of ECMO to MODS, deciphering the phase transition of MODS to ECMO support.  
337 Module M14 was specific to the comparison of ECMO and MODS, whereas modules  
338 M1 and M4 were specific to the comparison of MODS and CT. Pathways analysis of  
339 each module showed that genes in module M1 were involved in immune responses  
340 (Figure S10a) and genes in module M4 were involved in glucose metabolisms and  
341 glycogen breakdown (Figure S10b). However, module M15 (shared by both  
342 comparisons) showed enrichment of signaling pathways and proteins maintenance  
343 (Figure S10c). Module M14 belonging to genes that differed between ECMO and MODS  
344 was enriched with genes related to DNA damage, DNA maintenance and histone  
345 acetylation (Figure S10d). Together, DE analysis showed enrichment of immune related

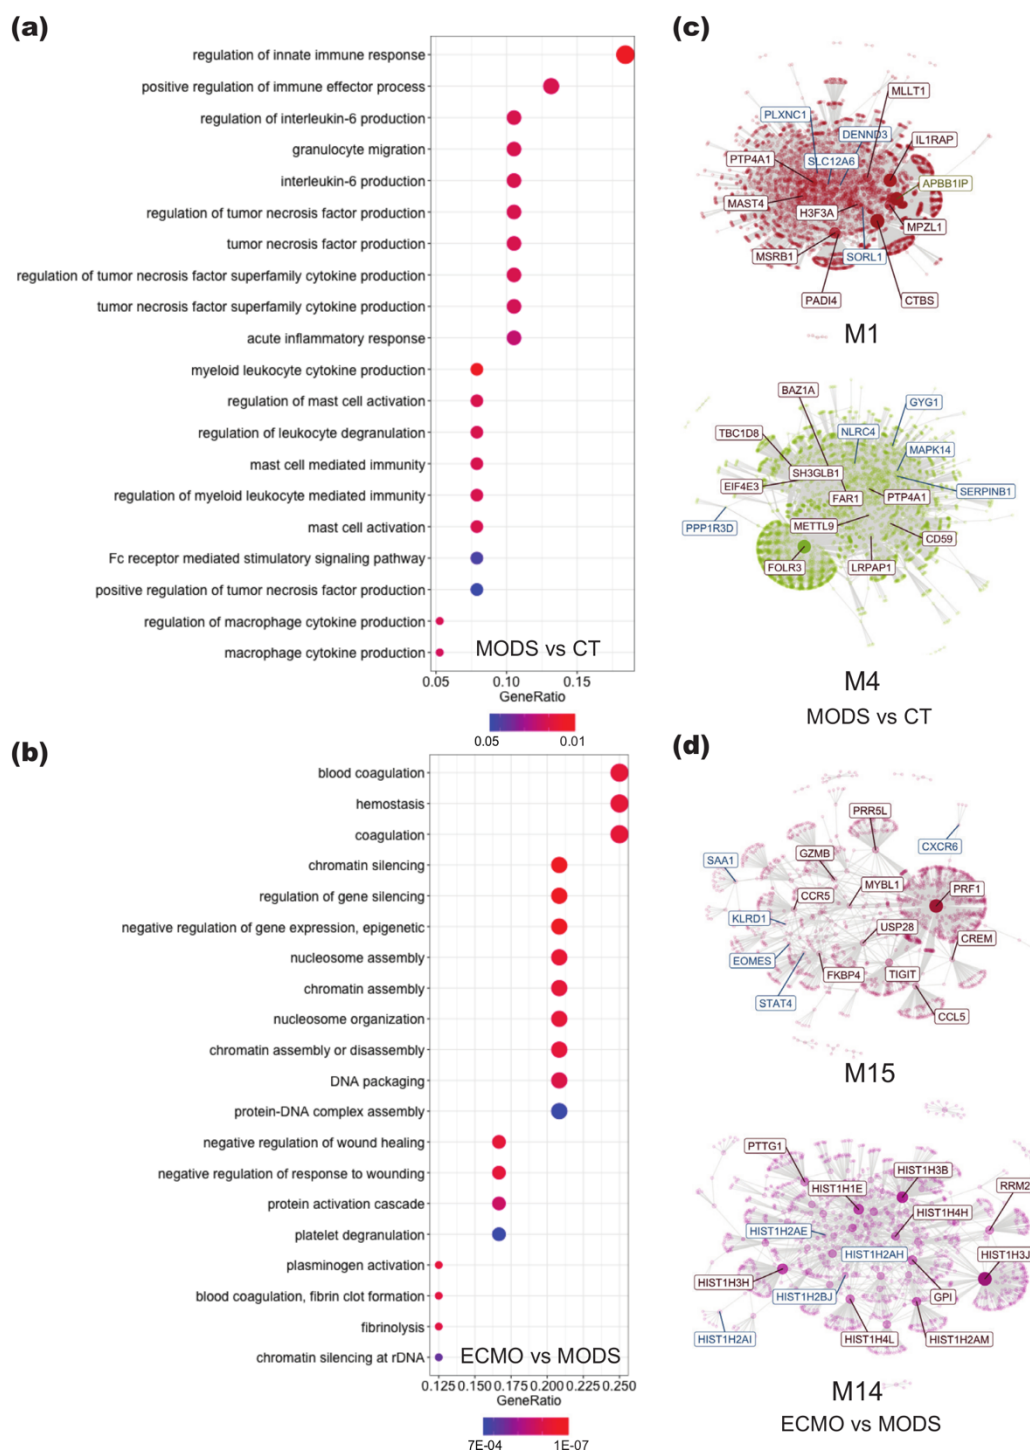

346

347 **Fig. 4 Gene enrichment and co-expression network analysis of DE genes in MODS and**

348 **CT, and in ECMO and MODS. (a) Gene ontology (GO) enrichment of DE genes from MODS to**

349 **CT showed their involvement in immune responses. (b) However, GO enrichment of DE genes**

350 **from ECMO to MODS displayed enrichment in epigenetic regulations. (c) The DE genes**

351 obtained from the comparison of MODS and CT were clustered into two separate groups. (d)  
352 Similarly, two co-expression networks were created after mapping the DE genes in ECMO and  
353 MODS. The highlighted genes in co-expressed networks are hub genes. Notably, many DE  
354 genes from both comparisons were shared in module 15 (M15), suggested phase transition.  
355 Size of circles in GO represents the number of mapped genes.

356

357 and glycogenolysis pathways in MODS, while protein maintenance and epigenetic-  
358 related pathways were enriched in ECMO. The protein-protein interaction network of the  
359 DE genes also revealed two distinct clusters: histone activation and blood coagulation  
360 were uniquely enriched in ECMO (Figure S11).

361 The GO enrichment analysis and co-expression analysis of DE genes expressed  
362 at 72h and 8d did not show any significantly enriched pathway in any of the  
363 comparisons. This observation may suggest that the MODS and ECMO patients have  
364 important physiological differences at baseline, but that other processes obfuscate  
365 these differences as diverse disease processes and therapeutic interventions unfold.  
366 Such baseline differences could be exploited for prognostic and potentially diagnostic  
367 purposes.

368

### 369 **Identification of molecular signatures associated with ECMO**

370 In 2018, Sweeney et al. [4] evaluated four prognostic biomarker signatures consisting of  
371 genes positively or negatively correlated with mortality in sepsis. We computed the  
372 geometric mean of the expression of these signature genes and investigated whether  
373 these values could be used as risk scores for MODS to ECMO progression. We  
374 observed that the risk scores derived from the signature genes that are positively

375 correlated with mortality among sepsis patients could differentiate ECMO and MODS  
 376 ( $P$ -value ranges from 0.04 to 0.01) (Figure S12).

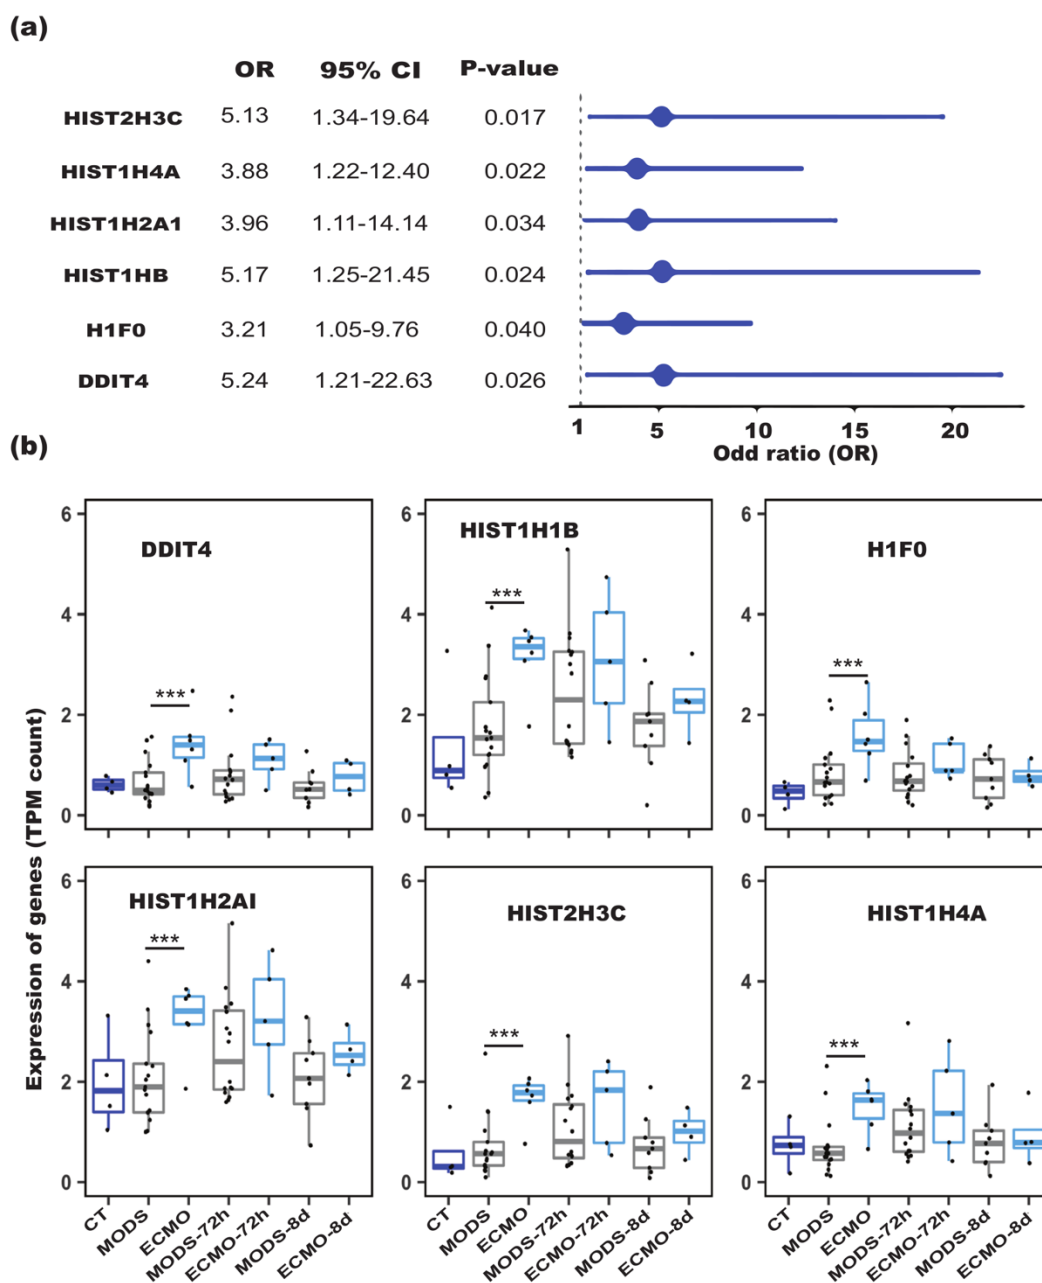

377  
 378 **Fig. 5 Univariate analyses of differentially expressed (DE) genes in ECMO and MODS.** (a)  
 379 Odds ratio of the DE genes between ECMO and MODS (reference). A total of 6 genes from 28  
 380 DE genes are significant (OR > 1 and P value < 0.05). (b) Expression of the DE genes in CT,  
 381 ECMO and MODS patients at different time points. The higher expression of the genes in  
 382 ECMO than in MODS at three time points (0h, 72h and 8d) suggests their strong association

383 with the deterioration from MODS to ECMO. Blue color displayed- control (CT), grey color  
384 displayed- MODS patients and cyan color displayed- ECMO patients.\*\*\* P-value < 1E-06.  
385

386 We next sought to derived the predictive power of the differentially expressed  
387 genes identified between ECMO and MODS. Six genes from our differential gene  
388 expression analysis demonstrated a very strong association with MODS for their  
389 progression to ECMO ( $P$ -value < 0.04, Fig. 5a) and these were used to create a  
390 signature for ECMO prediction. Most of these genes belong to the histone family  
391 (*HIST2H3C*, *HIST1H4A*, *HIST1H2AI*, *HIST1H1B*, and *H1F0*, Table 2) and these were  
392 expressed significantly higher in ECMO than MODS ( $P$ -value < 3.5e-6, Fig. 5b). In  
393 addition, the Human Protein Atlas dataset showed the enhanced expression of these  
394 genes in neutrophils (Figure S14).

395

396 **Table 2: List of signature genes strongly associated with ECMO.**

| Gene      | Ensemble        | Log <sub>2</sub> Fold change | Log CPM | P-value  | Adj. P-value | Protein coding | Function                          |
|-----------|-----------------|------------------------------|---------|----------|--------------|----------------|-----------------------------------|
| HIST2H3C  | ENSG00000203811 | 2.11                         | 3.88    | 9.10E-07 | 0.055        | Y              | histone cluster 2, H3c            |
| HIST1H4A  | ENSG00000278637 | 1.85                         | 0.24    | 1.00E-06 | 0.061        | Y              | histone cluster 1, H4a            |
| HIST1H2AI | ENSG00000196747 | 1.62                         | 3.86    | 3.40E-06 | 0.207        | Y              | histone cluster 1, H2ai           |
| HIST1H1B  | ENSG00000184357 | 1.92                         | 4.24    | 2.40E-06 | 0.147        | Y              | histone cluster 1, H1b            |
| H1F0      | ENSG00000189060 | 1.73                         | 4.5     | 3.50E-06 | 0.212        | Y              | H1 histone family, member 0       |
| DDIT4     | ENSG00000168209 | 2.02                         | 3.74    | 4.40E-07 | 0.026        | Y              | DNA-damage-inducible transcript 4 |

397

### 398 **Re-classification of patients and signature-based risk estimation**

399 Expression of the genes in our 6 gene risk signature was similar between CT and  
400 MODS, but higher in ECMO than MODS (Fig. 6a). Interestingly, when the additional

401 time points (72h and 8d) were added, these signature genes were not different in  
402 MODS and ECMO and could also be confirmed by the overlap of patients (Figure S15a  
403 and S15b). The risk scores derived from these genes were significantly different  
404 between ECMO and MODS (95%CI 1.54-42.91,  $P$ -value =  $7E-04$ , Fig. 6b) at baseline. In  
405 contrast, risk scores of MODS patients at 72h and 8d are close to those of ECMO  
406 patients at 72h and 8d (Fig. 6b).

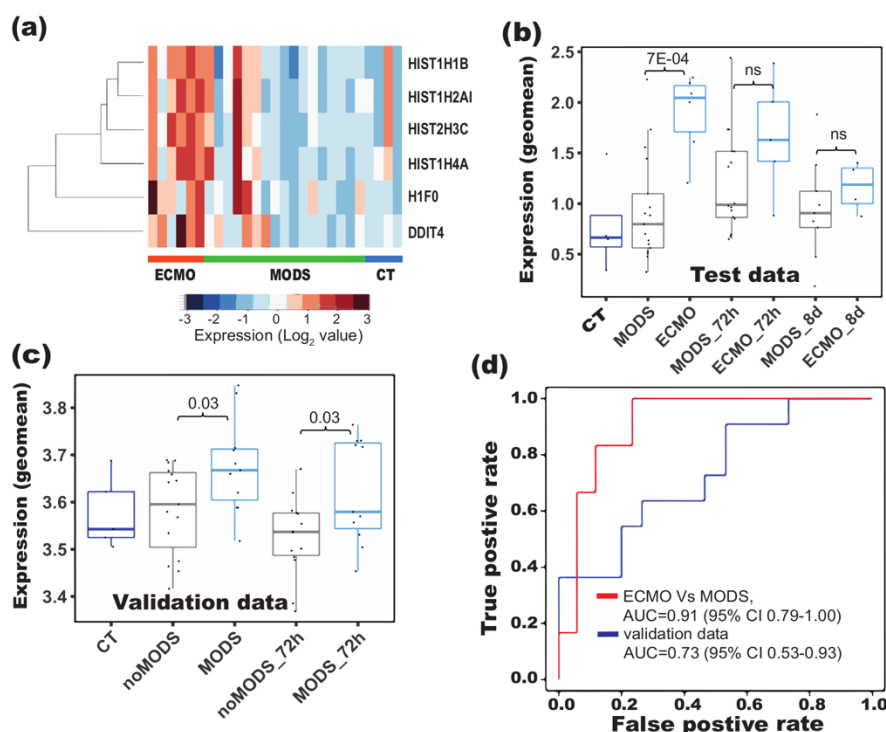

407  
408 **Fig. 6 Signature based re-classification of patients in the test (CT, MODS and ECMO)**  
409 **dataset and validation dataset.** (a) Heatmaps showed the clustering of signature genes in  
410 ECMO patients compared to control (CT) and MODS patients. Risk scores derived from the  
411 signature genes showed difference in (b) ECMO and MODS in our data, and in (c) MODS and  
412 noMODS (patients doesn't develop MODS) in the validation data (Cabrera et al., 2017). (d)  
413 Receiver operating characteristics (ROC) of the classification using our data and the validation  
414 data. A risk score for each patient was computed based on the geometric mean of the signature  
415 gene expression. Risk scores were strongly associated with ECMO and can be helpful to predict  
416 the probability of the MODS patients who require ECMO support.

417           Due to the lack of an appropriate pediatric cohort, we used previously published  
418 microarray data of adult patients that developed MODS after a major trauma as validation  
419 data. The authors had categorized the patients into two groups, those that developed  
420 MODS and those that did not (noMODS), however these were more sick compared to  
421 controls [9]. In their cohort, the risk score derived from our signature was significantly  
422 higher (95%CI 1.02-10.35,  $P$ -value =  $2E-02$ ) in MODS than noMODS (Fig. 6c). We further  
423 found that our signature genes can also classify patients (noMODS, and MODS) in the  
424 validation cohort at 0h (Figure S17a) as well as 72h timepoint (Figure S17b). Using logistic  
425 regression to train the risk scores led to a remarkable separation (AUC of 0.91 [95%CI  
426 0.79-1.00] for ECMO and MODS patients at baseline in our data and AUC of 0.8 [95%CI  
427 0.53-0.93] in the validation set) of two group of patients from our data as well as validation  
428 data, indicating a strong association of risk scores with MODS deterioration (Fig. 6d).

429

## 430 **Discussion**

431 The decision to initiate ECMO is often subjective, determined by the clinical judgement  
432 of the multidisciplinary care team in a very stressful and dynamic setting as opposed to  
433 quantitative measures of pathophysiology. Biological sampling of the exact organs  
434 affected is impractical if not impossible, but circulating white blood cells may serve as a  
435 proxy read out of stressed be experienced by multiple organ systems. We employed  
436 transcriptomics of peripheral white cells in an effort to improve our understanding of the  
437 response of circulating cells to multi-organ failure and its progression to either recovery  
438 or cardiopulmonary collapse culminating in the need for extra corporeal life support.



439 White blood cells are uniquely suited for this because aside from a few  
440 exceptions (e.g., memory T cells, some tissue macrophages), most of the mature blood  
441 cell types are mitotically inactive, metabolically active and relatively short-lived with half-  
442 lives ranging over hours to a few days. Thus, they are reflective of the environment they  
443 course through [17]. We found the gene *AREG* which regulates Amphiregulin a  
444 mediator for macrophage activity were preferentially activated in patients prior to ECMO  
445 [18-19]. Amphiregulin has been shown to an essential cardioprotective mediator  
446 produced by cardiac Ly6C macrophages in response to fluid overload, which is not  
447 unusual in MODS [20].

448 The activation of immune response and glycogenolysis in MODS compared to  
449 CT showed that patients in MODS need excessive energy for cellular homeostasis and  
450 activation of immune response against the initial infections. However, during the  
451 transition from MODS to ECMO, various signaling and protein maintenance pathways  
452 also got activated. Notably, DNA repair, DNA methylation and other epigenetic changes  
453 were activated in the patients who deceased further and needed ECMO support.

454 One of the key observations is the enrichment and strong association of histone  
455 genes with ECMO. The histone octamer *HIST2H3C*, *HIST1H2AI*, *HIST1H4*, and  
456 *HIST1H1B*, are genes that increase the availability of histones. Among these histones,  
457 *HIST2H3C*, *HIST1H2AI*, and *HIST1H4A* are highly expressed in neutrophils (Figure  
458 S14). Histones are a protein class, containing histone H1 and the core histones H2A,  
459 H2B, H3, and H4 [21] that are involved in numerous biological processes, largely  
460 through repressing transcription [22-23]. These are important due to their capability to  
461 determine if DNA is accessible for transcription and they have a major impact on gene

462 expression, too [24]. However, to allow processes like transcription or replication, this  
463 structure needs to change dynamically from a condensed state to an open one.

464 Genes that are associated with the histone cluster were found to be elevated.

465 Increases in serum histones have previously been shown to be elevated in patients with  
466 sepsis and heart failure [25-26]. Higher concentrations of circulatory histones are  
467 associated with poor survival in patients undergoing ECMO [27]. The increased  
468 availability of histones in pathologies that concur with a prolonged inflammatory  
469 response as is the case of sepsis. This is not only due to tissue damage but also to a  
470 second source: activated neutrophils generate neutrophil extracellular traps (NETs),  
471 structures made of cellular components which include specifically modified histones  
472 [28]. Generation of circulating histones from NETs or from necrotic neutrophils implies  
473 the release of a high concentration of histones to the bloodstream. Both processes,  
474 NET and apoptosis of neutrophils and necrosis of neutrophils and other immune cells,  
475 contribute to the pathogenesis of sepsis. NET however has been linked to organ failure  
476 [29-31]. In this study we showed that these processes are active enough to be  
477 uncovered by gene-expression.

478 This study shows that serial whole-blood transcriptomic profiling holds a great  
479 promise to predict MODS patients, which may need EMCO support. Several published  
480 gene signatures developed to predict mortality showed a significance in predicting  
481 ECMO, but none of them suffice as a marker in our case. Our new signature genes  
482 could remarkably differentiate MODS and ECMO. Their association with ECMO is  
483 considerably strong and is also able to distinguish the severe and moderate MODS  
484 patients in the validation cohort. The risk score derived from the signature genes for

485 each patient can be used to classify patients into two groups (ECMO and MODS) in our  
486 cohort . This is important because in spite of the limited sample size, using pediatric  
487 ECMO samples, the multiple time points and validation datasets increase the  
488 robustness of our findings. Furthermore the study included patients, where sepsis was  
489 not the primary cause of MODS indicating that histone signatures that occur in patients  
490 with MODS do so regardless of the initial insult. The signature genes need further  
491 evaluation by prospective studies in pediatric MODS/ECMO patients. Nevertheless, this  
492 study is one of the first to demonstrate that the potential of exploring clinical and  
493 transcriptomic features in identifying MODS patients from those requiring ECMO. In  
494 addition, this work may be of some help to guide the treatment of those infected patients  
495 at highest risk for progression to requiring ECMO support.

496

## 497 **Data and Code Availability**

498 The codes used in this analyses are available at [https://github.com/Bin-Chen-](https://github.com/Bin-Chen-Lab/MODS)  
499 [Lab/MODS](#). The processed data used in this study is available through NCBI GEO  
500 accession GSE144406.

501

502

## 503 **Acknowledgement**

504 Research reported in this publication was supported by the National Institute Of General  
505 Medical Sciences of the National Institutes of Health under Award Number  
506 R01GM134307. The content is solely the responsibility of the authors and does not  
507 necessarily represent the official views of the National Institutes of Health. We would  
508 like to thank Dr. Hui Shen for critical comments and the Van Andel Genomics Core for  
509 providing sequencing facilities and services.

510

511 **Author contributions**

512 Conceived and designed the experiments: BC, SR and RS. Performed the experiments:  
513 RS, ML and DM,. Analyzed the data: RS and PN. Contributed material/analysis tools:  
514 KL, JX, EK, JWP, GZ, ASB. Wrote the paper: RS, BC, EK, SR and ML. Supervised the  
515 study: BC and SR.

## 516 **References**

- 517 1. Weiss SL, Fitzgerald JC, Pappachan J, Wheeler D, Jaramillo-Bustamante JC,  
518 Salloo A, et al. Global epidemiology of pediatric severe sepsis: the sepsis  
519 prevalence, outcomes, and therapies study. *Am J Respir Crit Care Med.* 2015;  
520 191(10): 1147-57. <https://doi.org/10.1164/rccm.201412-2323OC> PMID: 25734408.
- 521 2. Bestati N, Leteurtre S, Duhamel A, Proulx F, Grandbastien B, Lacroix J, et al.  
522 Differences in organ dysfunctions between neonates and older children: a  
523 prospective, observational, multicenter study. *Crit Care.* 2010; 14(6): R202.  
524 <https://doi.org/10.1186/cc9323> PMID: 21062434.
- 525 3. Jenks CL, Raman L and Dalton HJ. Pediatric extracorporeal membrane  
526 oxygenation. *Crit Care Clin.* 2017; 33(4):825-41. [https://doi.org/](https://doi.org/10.1016/j.ccc.2017.06.005)  
527 10.1016/j.ccc.2017.06.005 PMID: 28887930.
- 528 4. Sweeney TE, Perumal TM, Henao R, Nichols M, Howrylak JA, Choi AM, et al. A  
529 community approach to mortality prediction in sepsis via gene expression analysis.  
530 *Nat Commun.* 2018; 9(1): 694. <https://doi.org/10.1038/s41467-018-03078-2> PMID:  
531 29449546.
- 532 5. Sweeney TE, Azad TD, Donato M, Haynes WA, Perumal TM, Henao R et al.  
533 Unsupervised analysis of transcriptomics in bacterial sepsis across multiple  
534 datasets reveals three robust clusters. *Crit Care Med.* 2018; 46(6): 915-925.  
535 <https://doi.org/10.1097/CCM.0000000000003084> PMID: 29537985.
- 536 6. Sweeney TE, Shidham A, Wong HR and Khatri P. A comprehensive time-course-  
537 based multicohort analysis of sepsis and sterile inflammation reveals a robust  
538 diagnostic gene set. *Sci Transl Med.* 2015; 7(287): 287ra71.  
539 <https://doi.org/10.1126/scitranslmed.aaa5993> PMID: 25972003.
- 540 7. Cabrera CP, Manson J, Shepherd JM, Torrance HD, Watson D, Longhi MP, et al.  
541 Signatures of inflammation and impending multiple organ dysfunction in the  
542 hyperacute phase of trauma: A prospective cohort study. *PLoS Med.* 2017; 14(7):  
543 e1002352. <https://doi.org/10.1371/journal> PMID.1002352.
- 544 8. Kort EJ, Weiland M, Grins E, Eugster E, Milliron HY, Kelty C, et al. Single cell  
545 transcriptomics is a robust approach to defining disease biology in complex clinical  
546 settings. *bioRxiv.* 2019; 568659. <https://doi.org/10.1101/568659>.

- 547 9. Dobin A, Davis CA, Schlesinger F, Drenkow J, Zaleski C, Jha S, et al. STAR:  
548 ultrafast universal RNA-seq aligner. *Bioinformatics*. 2013; 29(1): 15-21.  
549 <https://doi.org/10.1093/bioinformatics/bts635> PMID:23104886.
- 550 10. Robinson MD, McCarthy DJ, Smyth GK. edgeR: a Bioconductor package for  
551 differential expression analysis of digital gene expression data. *Bioinformatics*.  
552 2010; 26(1): 139-40. <https://doi.org/10.1093/bioinformatics/btp616>  
553 PMID:19910308.
- 554 11. Russo PdST, Ferreira GR, Cardozo LE, Burger MC, Arias-Carrasco R, Maruyama  
555 SR et al. "CEMiTool: a Bioconductor package for performing comprehensive  
556 modular co-expression analyses." *BMC Bioinformatics*. 2018; 19(56): 1–13.  
557 <https://doi.org/10.1186/s12859-018-2053-1> PMID: 29458351.
- 558 12. Yu G, Wang L, Han Y and He Q. clusterProfiler: an R package for comparing  
559 biological themes among gene clusters. *OMICS*. 2012; 16(5): 284-287.  
560 <https://doi.org/10.1089/omi.2011.0118> PMID:22455463.
- 561 13. Newman AM, Liu CL, Green MR, Gentles AJ, Feng W, Xu Y, et al. Robust  
562 enumeration of cell subsets from tissue expression profiles. *Nat Methods*. 2015;  
563 12(5): 453. <https://doi.org/10.1038/nmeth.3337> PMID: 25822800.
- 564 14. Schölkopf B, Smola AJ, Williamson RC, Bartlett PL. New support vector algorithms.  
565 *Neural Comput*. 2000; 12: 1207–1245.  
566 <https://doi.org/10.1162/089976600300015565>.
- 567 15. Robin X, Turck N, Hainard A, Tiberti N, Lisacek F, Sanchez JC, et al. pROC: an  
568 open-source package for R and S+ to analyze and compare ROC curves. *BMC*  
569 *bioinformatics*. 2011; 12(1): 77. <https://doi.org/10.1186/1471-2105-12-77>  
570 [PMID:21414208](https://pubmed.ncbi.nlm.nih.gov/21414208/).
- 571 16. Hall MW, Gavrilin MA, Knatz NL, Duncan MD, Fernandez SA, Wewers MD.  
572 Monocyte mRNA phenotype and adverse outcomes from pediatric multiple organ  
573 dysfunction syndrome. *Pediatr Res*. 2007; 62(5):597.  
574 <https://doi.org/10.1203/PDR.0b013e3181559774> PMID: 17805202.
- 575 17. Boettcher S, Manz MG. Regulation of inflammation-and infection-driven  
576 hematopoiesis. *Trends Immunol*. 2017; 38(5): 345-57.  
577 <https://doi.org/10.1016/j.it.2017.01.004> PMID: 28216309.

- 578 18. Meng C, Liu G, Mu H, Zhou M, Zhang S, Xu Y. Amphiregulin may be a new  
579 biomarker of classically activated macrophages. *Biochem Biophys Res Commun.*  
580 2015; 466(3): 393-9. <https://doi.org/10.1016/j.bbrc.2015.09.037> PMID: 26365345.
- 581 19. Zaiss DM, Gause WC, Osborne LC, Artis D. Emerging functions of amphiregulin  
582 in orchestrating immunity, inflammation, and tissue repair. *Immunity.* 2015; 42(2):  
583 216-26. <https://doi.org/10.1016/j.immuni.2015.01.020> PMID: 25692699.
- 584 20. Fujii K, Shibata M, Nakayama Y, Ogata F, Matsumoto S, Noshita K, et al. A heart–  
585 brain–kidney network controls adaptation to cardiac stress through tissue  
586 macrophage activation. *Nat Med.* 2017; 23(5): 611.  
587 <https://doi.org/10.1038/nm.4326> PMID: 28394333.
- 588 21. Campos EI, Reinberg D. Histones: annotating chromatin. *Annu Rev Genet.* 2009;  
589 43: 559–599. <https://doi.org/10.1146/annurev.genet.032608.103928> PMID:  
590 19886812.
- 591 22. Grant PA. A tale of histone modifications. *Genome Biol.* 2001; 2(4): reviews0003-  
592 1. <https://doi.org/10.1186/gb-2001-2-4-reviews0003> PMID: 11305943.
- 593 23. Jenuwein T, Allis CD. Translating the histone code. *Science.* 2001; 293(5532):  
594 1074-80. <https://doi.org/10.1126/science.1063127> PMID: 11498575.
- 595 24. Falvo JV, Jasenosky LD, Kruidenier L, Goldfeld AE. Epigenetic control of cytokine  
596 gene expression: regulation of the TNF/LT locus and T helper cell differentiation.  
597 *Adv Immunol.* 2013; 118: 37-128. [https://doi.org/10.1016/B978-0-12-407708-  
598 9.00002-9](https://doi.org/10.1016/B978-0-12-407708-9.00002-9) PMID: 23683942.
- 599 25. Ekaney ML, Otto GP, Sossdorf M, Sponholz C, Boehringer M, Loesche W, et al.  
600 Impact of plasma histones in human sepsis and their contribution to cellular injury  
601 and inflammation. *Crit Care.* 2014; 18(5): 543. [https://doi.org/10.1186/s13054-014-  
602 0543-8](https://doi.org/10.1186/s13054-014-0543-8) PMID: 25260379.
- 603 26. Alhamdi Y, Abrams ST, Cheng Z, Jing S, Su D, Liu Z, et al. Circulating histones  
604 are major mediators of cardiac injury in patients with sepsis. *Crit Care Med.* 2015;  
605 43(10): 2094-103. <https://doi.org/10.1097/CCM.0000000000001162> PMID:  
606 26121070.
- 607 27. Wen Z, Jin Y, Jiang X, Sun M, Arman N, Wen T, et al. Extracellular histones  
608 indicate the prognosis in patients undergoing extracorporeal membrane

- 609 oxygenation therapy. *Perfusion*. 2019; 34(3): 211-216.  
610 <https://doi.org/10.1177/0267659118809557> PMID: 30370815.
- 611 28. Xu J, Zhang X, Pelayo R, Monestier M, Ammollo CT, Semeraro F, et al.  
612 Extracellular histones are major mediators of death in sepsis. *Nat Med*. 2009;  
613 15(11): 1318. <https://doi.org/10.1038/nm.2053> PMID: 19855397.
- 614 29. Czaikoski PG, Mota JM, Nascimento DC, Sônego F, Melo PH, Scortegagna GT,  
615 et al. Neutrophil extracellular traps induce organ damage during experimental and  
616 clinical sepsis. *PloS one*. 2016; 11(2): e0148142.  
617 <https://doi.org/10.1371/journal.pone.0148142> PMID: 26849138.
- 618 30. Nakazawa D, Kumar SV, Marschner J, Desai J, Holderied A, Rath L, et al. Histones  
619 and neutrophil extracellular traps enhance tubular necrosis and remote organ  
620 injury in ischemic AKI. *J Am Soc Nephrol*. 2017; 28(6): 1753-68.  
621 <https://doi.org/10.1681/ASN.2016080925> PMID: 28073931.
- 622 31. Li RH, Tablin F. A comparative review of neutrophil extracellular traps in sepsis.  
623 *Front Vet Sci*. 2018; 5. <https://doi.org/10.3389/fvets.2018.00291> PMID: 30547040.



## Supplementary information:

### Gene expression signatures identify pediatric patients with multiple organ dysfunction who require advanced life support in the intensive care unit

**Running title:** Transcriptional signature for multiple organ dysfunction syndrome trajectory

Rama Shankar (ramashan@msu.edu)<sup>1,2</sup>, Mara L. Leimanis (Mara.Leimanis@spectrumhealth.org)<sup>1,3</sup>, Patrick A. Newbury (rnewbury@gmail.com)<sup>1,2</sup>, Ke Liu (liuke2@msu.edu)<sup>1,2</sup>, Jing Xing (xingjin1@msu.edu)<sup>1,2</sup>, Derek Nedveck (dnedveck@gmail.com)<sup>4</sup>, Eric J. Kort (eric.kort@helendevoschildrens.org)<sup>1,5,6</sup>, Jeremy W Prokop (prokopje@msu.edu)<sup>1,2</sup>, Guoli Zhou ([zhoug@msu.edu](mailto:zhoug@msu.edu))<sup>7</sup>, André S Bachmann (bachma26@msu.edu)<sup>1</sup>, Bin Chen ([chenbi12@msu.edu](mailto:chenbi12@msu.edu))<sup>1,2\*</sup>, Surender Rajasekaran (surender.rajasekaran@spectrumhealth.org)<sup>1,3,4\*</sup>

**1** Department of Pediatrics and Human Development, College of Human Medicine, Michigan State University, Grand Rapids, MI 49503, USA

**2** Department of Pharmacology and Toxicology, College of Human Medicine, Michigan State University, Grand Rapids, MI 49503, USA

**3** Pediatric Intensive Care Unit, Helen DeVos Children's Hospital, 100 Michigan Street NE, Grand Rapids, MI, 49503, USA

**4** Office of Research, Spectrum Health, 15 Michigan Street NE, Grand Rapids, MI 49503, USA

**5** DeVos Cardiovascular Program, Van Andel Research Institute and Fredrik Meijer Heart and Vascular Institute/Spectrum Health, Grand Rapids, MI 49503, USA

**6** Pediatric Hospitalist Medicine, Helen DeVos Children's Hospital, 100 Michigan Street NE, Grand Rapids, MI, 49503, USA

**7** Biomedical Research Informatics Core (BRIC), Clinical and Translational Sciences Institute (CTSI), Michigan State University, East Lansing, MI 48824, USA

\* Correspondence: Dr. Bin Chen ([chenbi12@msu.edu](mailto:chenbi12@msu.edu)) and Dr. Surender Rajasekaran ([surender.rajasekaran@spectrumhealth.org](mailto:surender.rajasekaran@spectrumhealth.org))

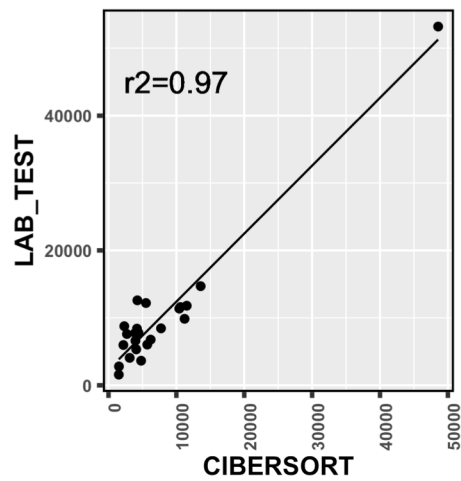

**Figure S1. Correlation of neutrophils obtained from lab test data and derived from CIBERSORT.** The values closely correlated with each other (Correlation value= 0.97).

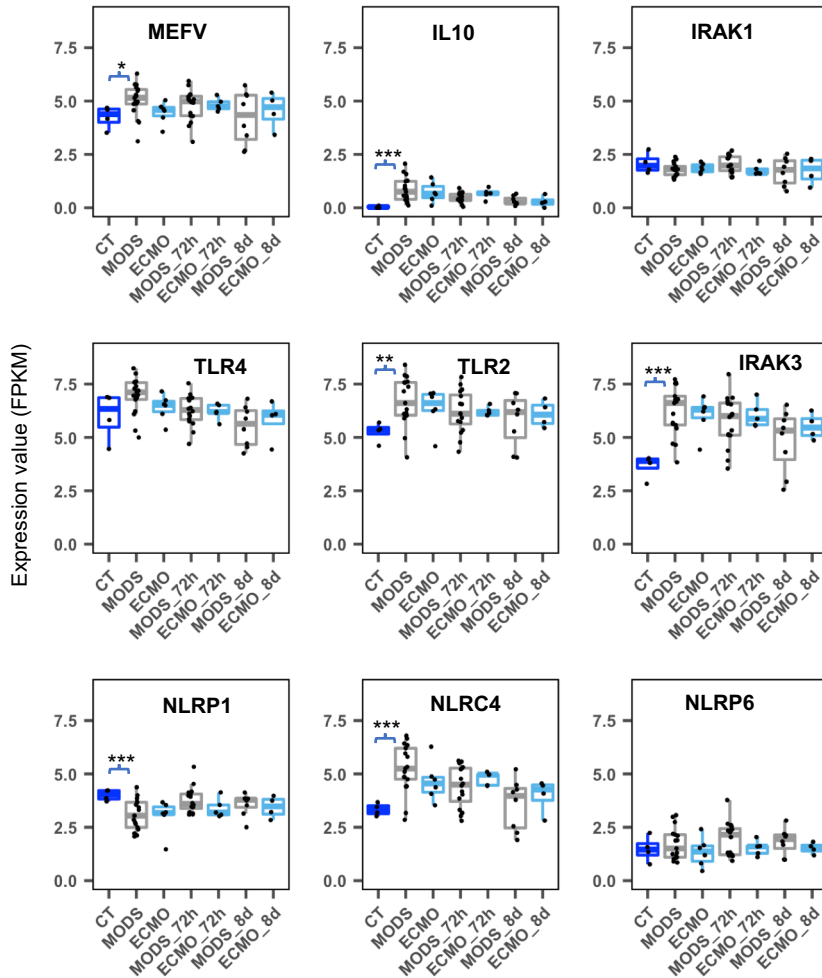

**Figure S2. Expression of monocyte genes (based on study of Hall et al., 2007) in control (CT), MODS and ECMO patients at different time points (0h, 72h and 8d). (\* 0.01 < P value < 0.05; \*\* 0.001 < P value < 0.01; \*\*\* 7.3e-6 < P value < 0.001).**

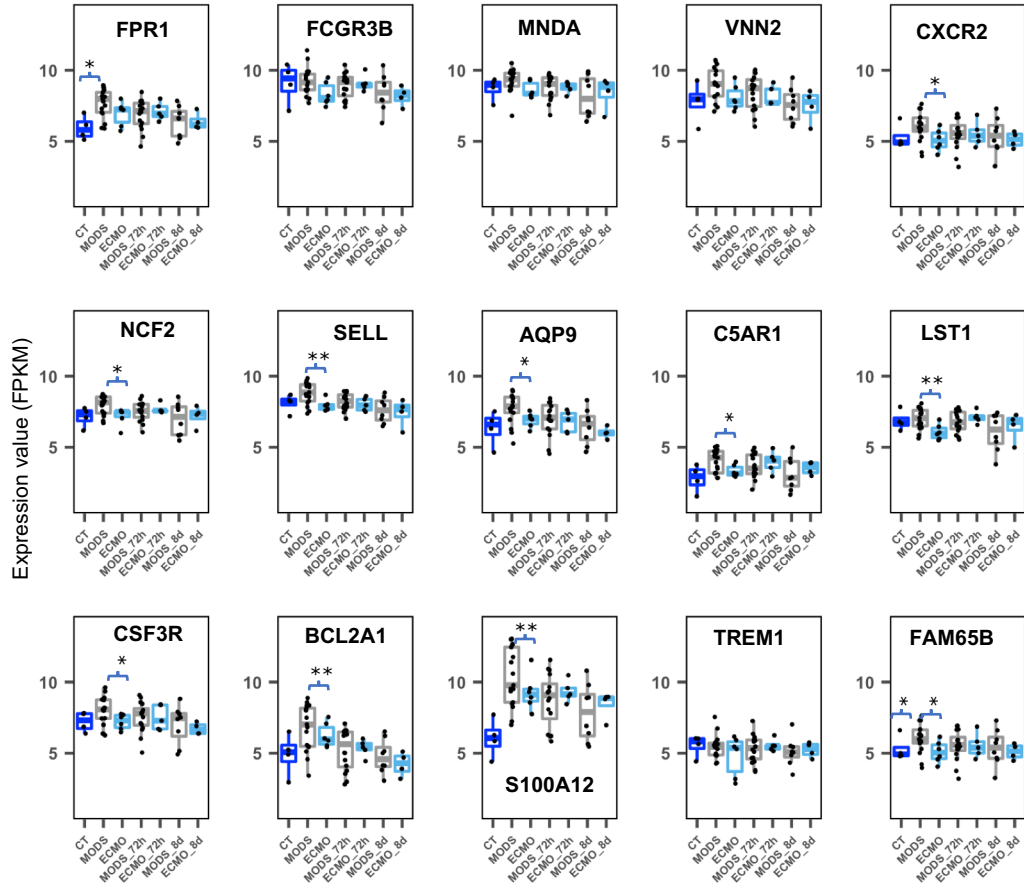

**Figure S3. Expression of neutrophils genes (based on CIBERSORT cell marker) in control (CT), MODS and ECMO patients at different time points(0h, 72h and 8d). (\*  $0.05 > p \leq 0.01$  and \*\*  $0.01 > p < 0.001$ ).**

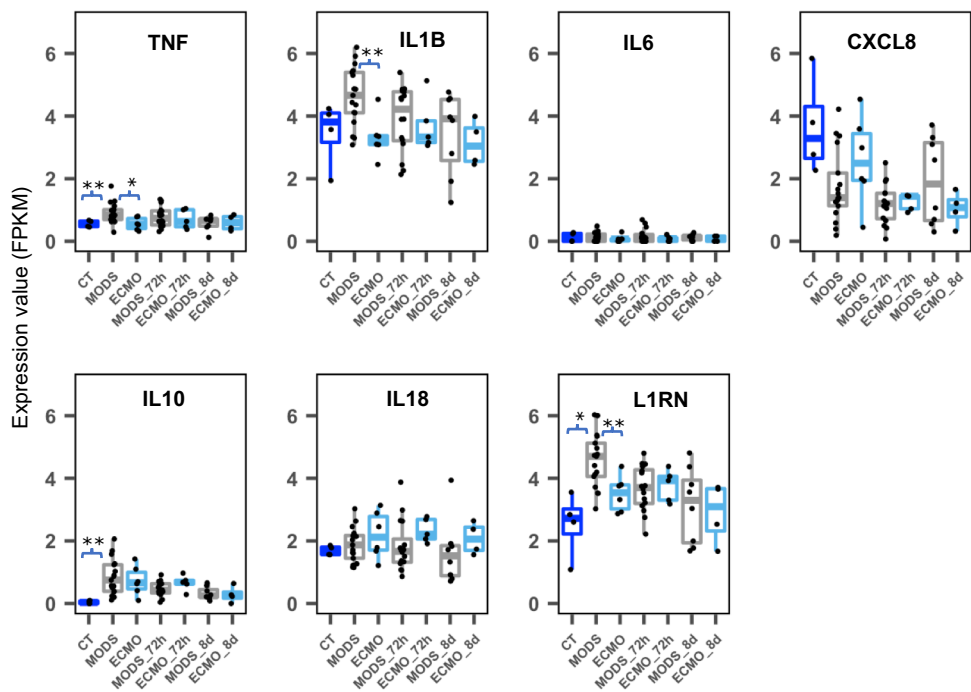

**Figure S4. Expression of cytokines genes (based on study of Hall et al., 2007) in control (CT), MODS and ECMO patients at different time points(0h, 72h and 8d). (\*  $0.05 > p \leq 0.01$  and \*\*  $0.01 > p < 2.5e-05$ ).**

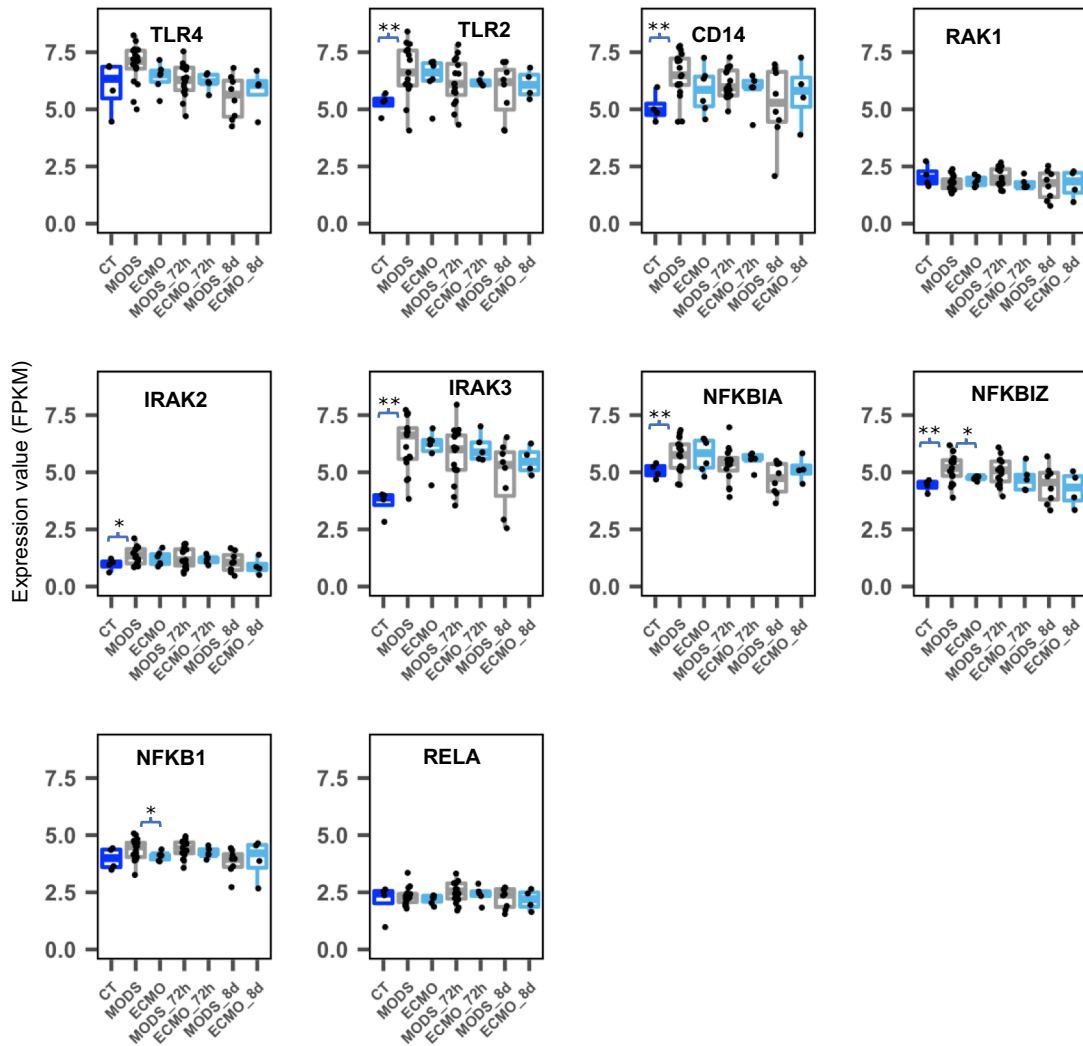

**Figure S5. Expression of NF- $\kappa$ B signaling pathway (based on study of Hall et al., 2007) in control (CT), MODS and ECMO patients at different time points(0h, 72h and 8d). (\*  $0.05 > p \leq 0.01$  and \*\*  $0.01 > p < 7.3e-05$ ).**

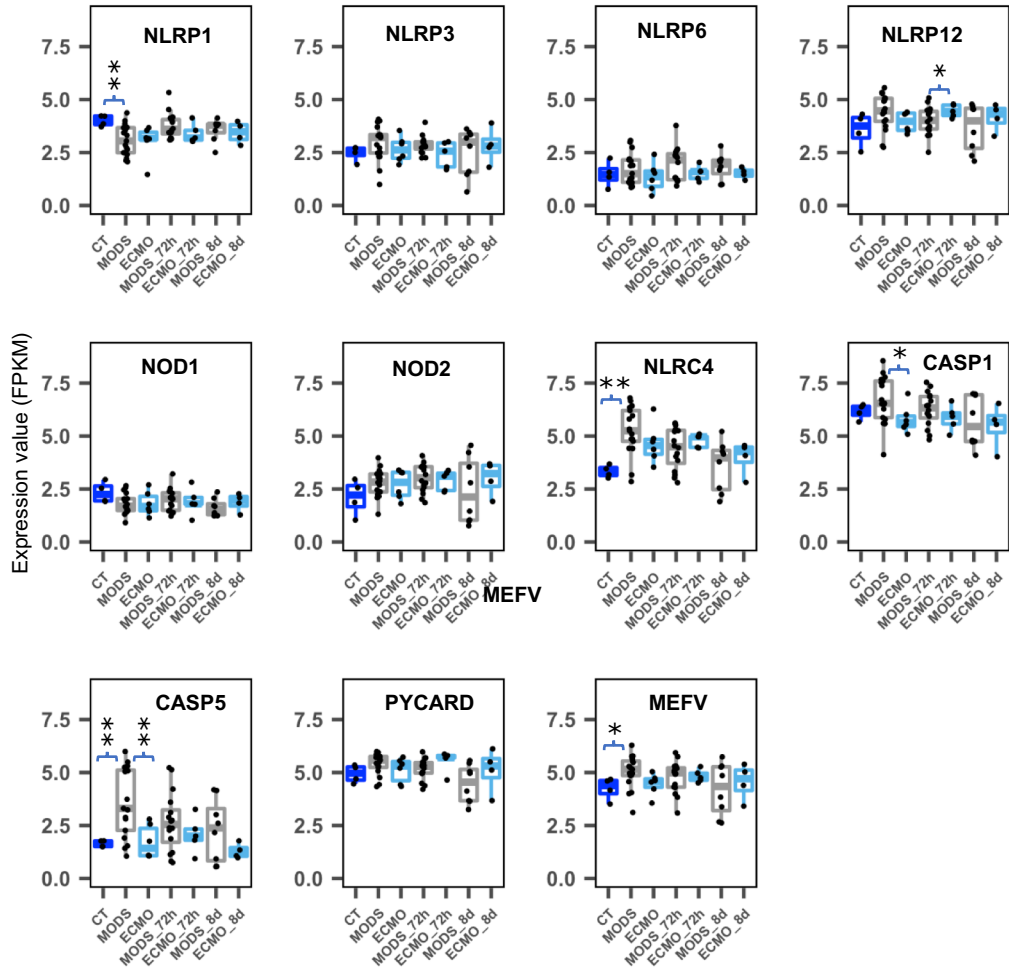

**Figure S6. Expression of genes involved in inflammasome elements (based on study of Hall et al., 2007) in control (CT), MODS and ECMO patients at different time points(0h, 72h and 8d). (\*  $0.05 > p \leq 0.01$  and \*\*  $0.01 > p < 7.8e-06$ ).**

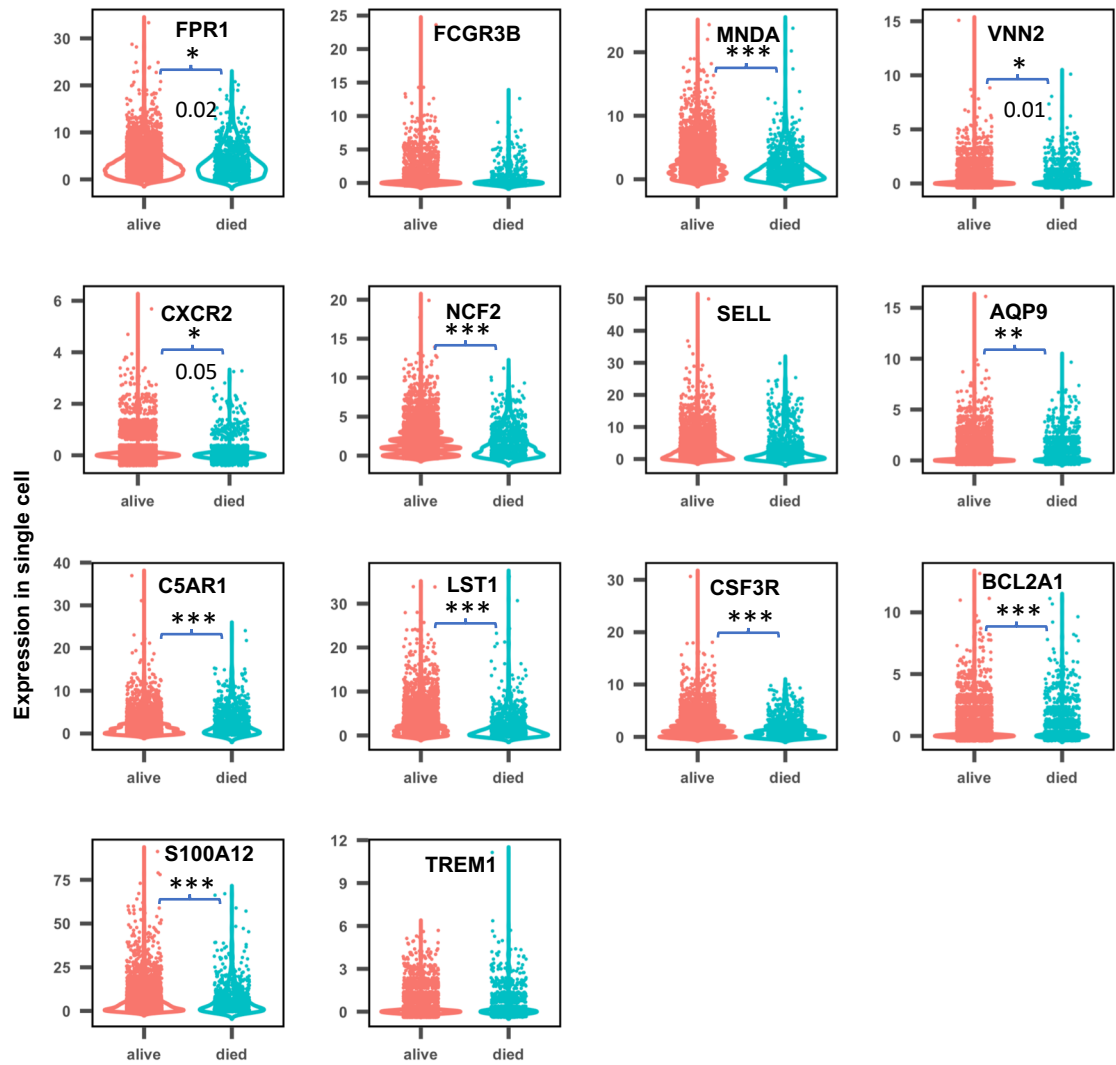

**Figure S7. Expression of marker genes for neutrophils cells in single cell data of ECMO adult patients (Kort et al., 2019). Red- Surviving ECMO patients and Green- Died ECMO patients. (\*  $0.01 < P \text{ value} < 0.05$ ; \*\*  $0.001 < P \text{ value} < 0.01$ ; \*\*\*  $2e-16 < P \text{ value} < 0.001$ ).**



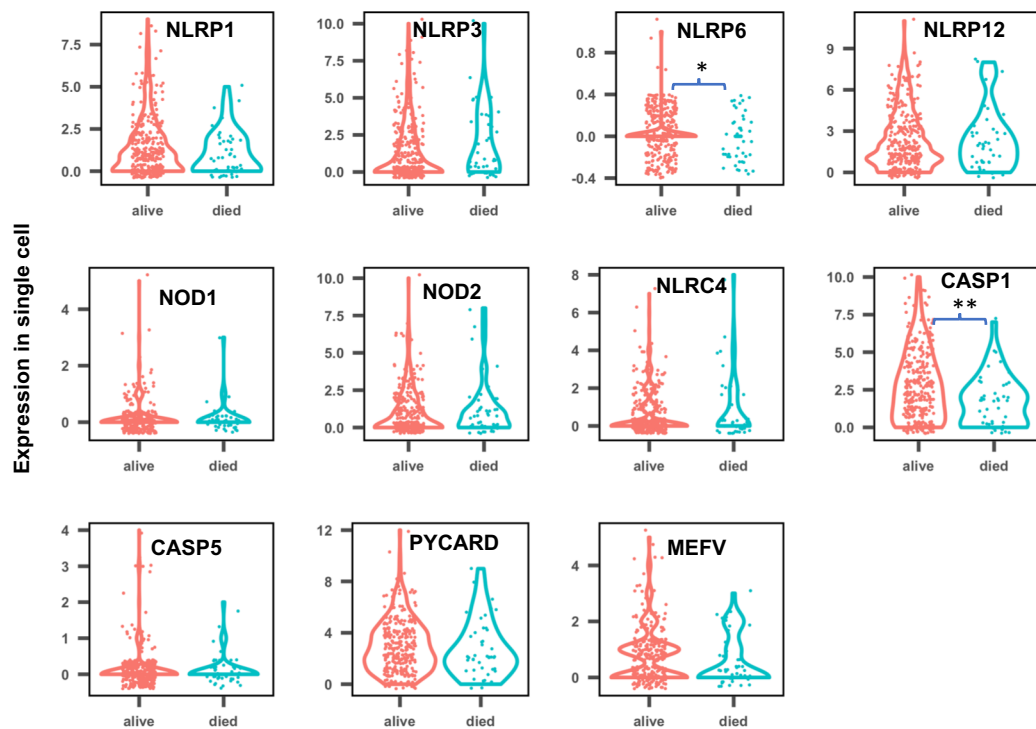

**Figure S8. Expression of genes involved in inflammatory response in each cell from the single cell data of ECMO adult patients (Kort et al., 2019). Red-Surviving ECMO patients and Green- Died ECMO patients. (\*  $0.01 < P \text{ value} < 0.05$  and \*\*  $0.0008 < P \text{ value} < 0.01$ ).**

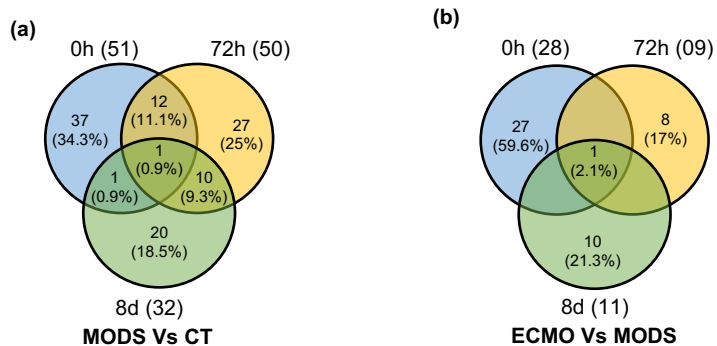

**Figure S9. Comparisons of differential gene expression.** Venn diagram showing the comparisons of differentially expressed genes in between (a) MODS and control (CT) and (b) in between ECMO and MODS patients at different time points; baseline (0h), 72h and 8d.

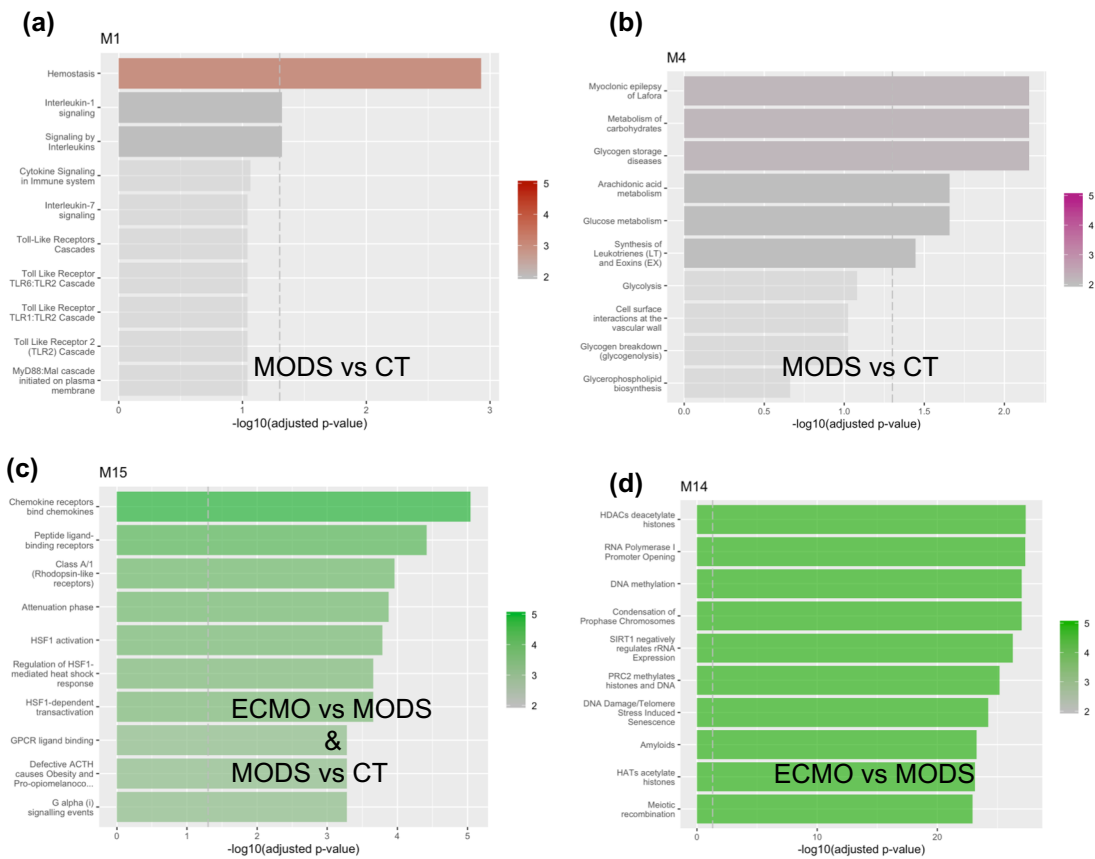

**Figure S10. Pathways enriched by the genes present in different co-expressed networks module.** (a, b) Enriched pathways are shown by the DE genes from MODS vs CT and mapped on two co-expressed networks. (c) Enriched pathways shared by the DE genes in MODS vs CT and in ECMO vs MODS are shown. This showed the transition from MODS to ECMO. (d) In addition, epigenetic modifications related processes were activated in the severe MODS patients, who require ECMO support.

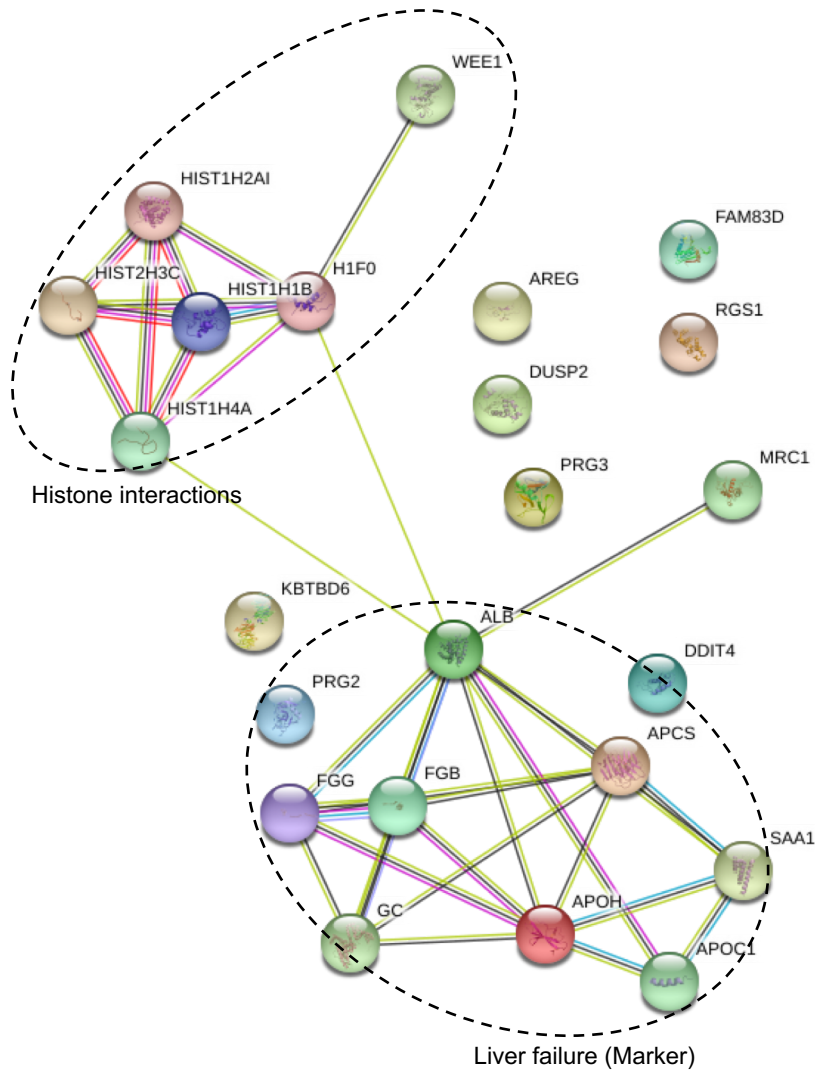

**Figure S11. Interaction of genes associated with ECMO at baseline (0h).** Two main networks (Histone interactions and gene markers for liver failure) were enriched.

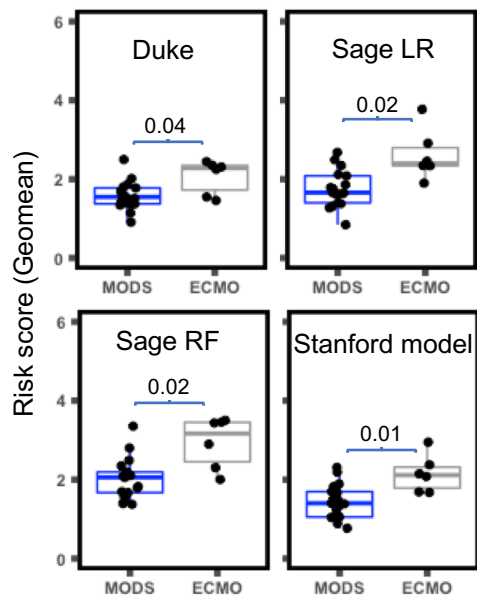

**Figure S12. Risk scores derived from the putative signatures predicted for sepsis patients (Sweeney et al., 2018).** The signatures have been derived from different models namely, Duke, Sage LR, Sage RF and Stanford. These signatures are composed of two categories, i.e, positively and negatively associated with patients mortality. However, only the signature which are positively associated with patients mortality showed the difference in MODS and ECMO.

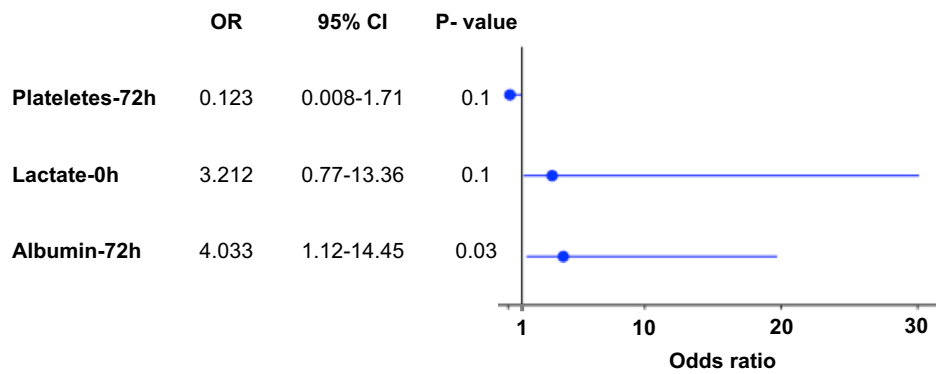

**Figure S13. Odds ratio for clinical data.** Clinical data available for all the ECMO and MODS patients at different time points were used to compute the odds ratio. Significantly (P value  $\leq 0.03$ ) higher odds ratio for Albumin was observed in ECMO as compared to MODS patients.

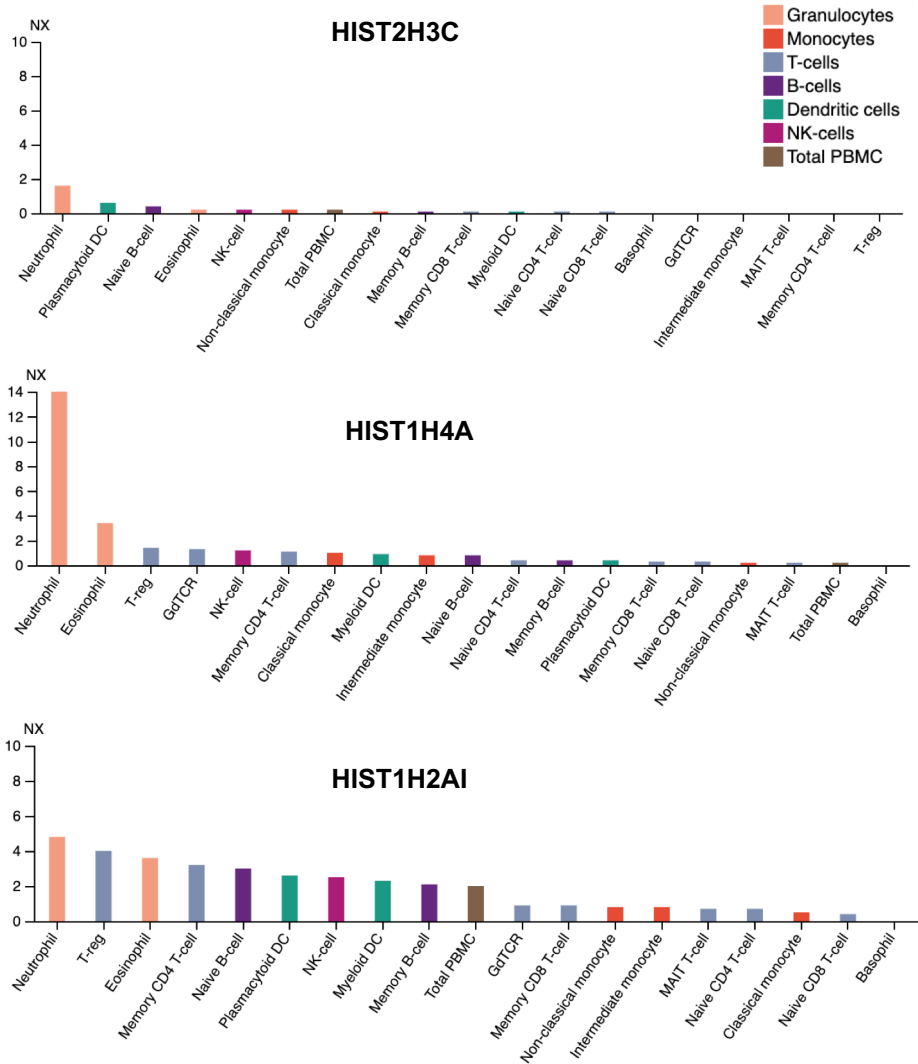

**Figure S14. Expression pattern of some of histone genes in blood cells (Human protein atlas).** It was observed that HIST2H3C, HIST1H4A, HIST1H2AI is highly expressed in neutrophils.

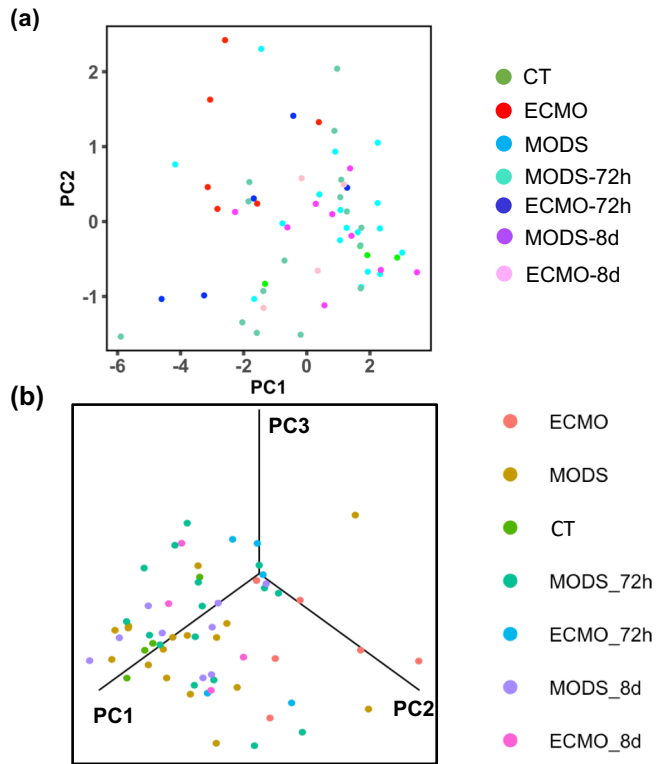

**Figure S15. Labeled PCA comparing CT, MODS and ECMO at different time points.** (a) Labeled PCA based on gene signature separated all the patients of different time points into CT, MODS and ECMO group. (b) PC1 and PC2 with PC3 provide more clear differentiation of patients.



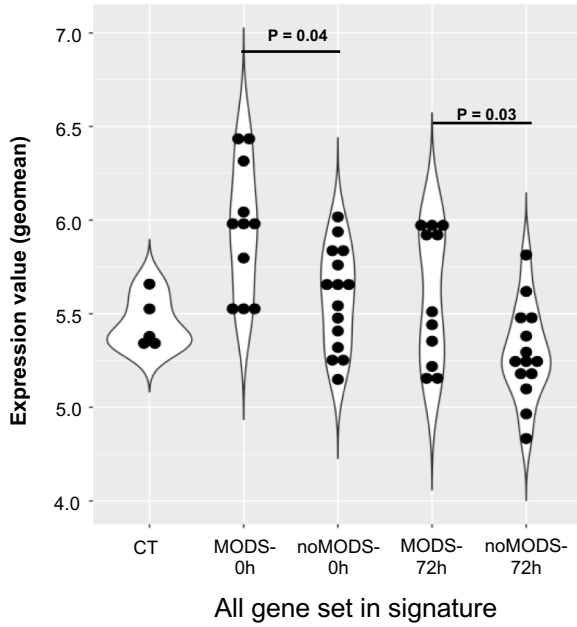

**Figure S16. Comparison of all genes in validation data (Cabrera et al., 2017).** The violin plot displayed differences in the expression values in MODS and noMODS patients at ( $P = 0.04$ ) 0h and ( $P = 0.03$ ) 72h time point.

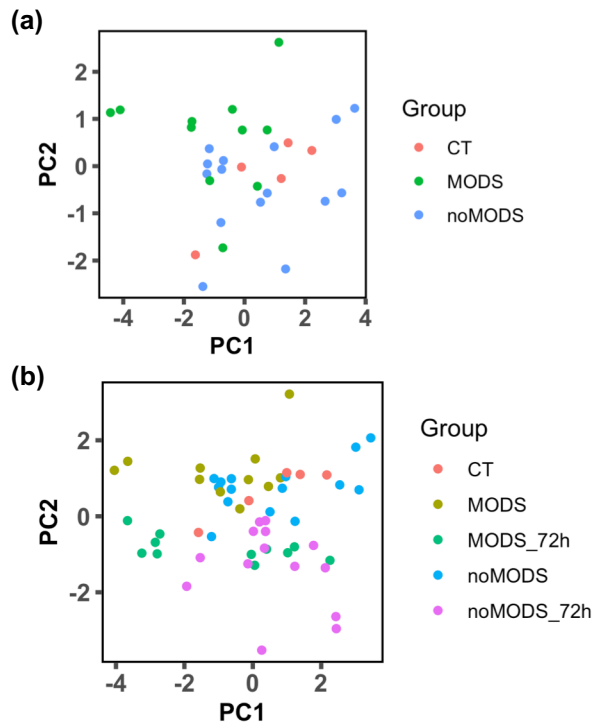

**Figure S17. Labeled PCA separated the control (CT), noMODS (patients doesn't develop MODS) and MODS (develop MODS) patients in the validation cohort (Cabrera et al., 2017).** (a) The labeled PCA using the signature genes associated with ECMO separated the MODS and noMODS. (b) The labeled PCA from different time points also separated MODS and noMODS patients with minimal overlap of patients at 72h. Although patients in the validation cohort data were adult, the remarkable separation indirectly validated the signature genes associated with pediatrics ECMO.

Table S1. Patient demographics at 72h and 8d time points.

| RNA-Seq cohort          |                  |                 |         |                 |                  |         |
|-------------------------|------------------|-----------------|---------|-----------------|------------------|---------|
| Demographics            | MODS             | ECMO            | P-value | MODS            | ECMO             | P-value |
| Time                    | 72h              |                 |         | 8d              |                  |         |
| Number                  | 16               | 5               | -       | 9               | 4                | -       |
| Age (months)            | -                | -               | -       | -               | -                | -       |
| Male                    | 9                | 4               | -       | 4               | 3                | -       |
| Female                  | 7                | 1               | -       | 5               | 1                | -       |
| BMI                     | -                | -               | -       | -               | -                | -       |
| Weight                  | -                | -               | -       | -               | -                | -       |
| Height                  | -                | -               | -       | -               | -                | -       |
| Mortality               | -                | -               | -       | -               | -                | -       |
| Clinical Features       |                  |                 |         |                 |                  |         |
| Liver Failure (%)       | -                | -               | -       | -               | -                | -       |
| Renal Failure           | -                | -               | -       | -               | -                | -       |
| Creatinine              | 0.53(0.16-1.16)  | 0.95(0.25-2.5)  | 0.4     | 0.74(0.16-2.38) | 0.63(0.15-1.86)  | 0.84    |
| Bilirubin               | 1.25(0.1-11.5)   | 2.2(0.6-6.8)    | 0.51    | 0.61(0.2-2)     | 0.67(0.3-1.2)    | 0.83    |
| AST                     | 182.93(14-2010)  | 1798.2(45-4924) | 0.19    | 34.87(11-112)   | 51.25(15-80)     | 0.39    |
| Albumin                 | 2.66(2-4.5)      | 3.58(2.6-4.4)   | 0.03*   | 2.85(2.2-3.6)   | 3.3(2.5-4.1)     | 0.28    |
| Lactate                 | 1.37(0.6-2.5)    | 1.8(1.2-3.2)    | 0.34    | 1.5(0.9-2.2)    | 1.47(1.3-1.8)    | 0.8     |
| WBC                     | 10.94(4.05-24.7) | 9.97(5.72-14.9) | 0.65    | 8.46(1.42-17.9) | 11.59(9.7-13.38) | 0.25    |
| platelet                | 230(35-772)      | 111.8(73-148)   | 0.025*  | 141.25(97-161)  | 202.57(30-404)   | 0.23    |
| CRP                     | 83(0.9-189)      | 60.83(5.6-121)  | 0.49    | 78.12(8.6-167)  | 57.1(13-135)     | 0.69    |
| Pelod Score             | 14.18(11-31)     | 17.2(1-32)      | 0.3     | 10.7 (1-21)     | 8.5(1-21)        | 0.33    |
| Bacterial infection (%) | -                | -               | -       | -               | -                | -       |
| Viral infection (%)     | -                | -               | -       | -               | -                | -       |
| Respiratory failure (%) | -                | -               | -       | -               | -                | -       |
| Neurological            | -                | -               | -       | -               | -                | -       |

Where relevant, mean(range). T-test and fisher's exact test was used to compute *P*-value between MODS and ECMO.

Table S2. List of differentially expressed genes in ECMO as compared to MODS patients at baseline (0h).

| Gene          | Ensemble        | Log <sup>2</sup> Fold Change | Log CPM | P-value | Adj. P-value | Protein coding | Function                                             |
|---------------|-----------------|------------------------------|---------|---------|--------------|----------------|------------------------------------------------------|
| RGS1          | ENSG00000090104 | 4.12                         | 2.75    | 1.3E-08 | 0.001        | Y              | regulator of G-protein signaling 1                   |
| APOH          | ENSG00000091583 | 6.91                         | -2.00   | 2.5E-08 | 0.001        | Y              | apolipoprotein H (beta-2-glycoprotein I)             |
| FAM83D        | ENSG00000101447 | 1.97                         | -0.23   | 1.7E-07 | 0.010        | Y              | family with sequence similarity 83, member D         |
| AREG          | ENSG00000109321 | 3.51                         | 0.49    | 2.0E-06 | 0.118        | Y              | amphiregulin                                         |
| APOC1         | ENSG00000130208 | 3.37                         | -1.93   | 2.0E-06 | 0.121        | Y              | apolipoprotein C-I                                   |
| APCS          | ENSG00000132703 | 5.12                         | -2.93   | 5.6E-07 | 0.034        | Y              | amyloid P component, serum                           |
| GC            | ENSG00000145321 | 6.76                         | -2.08   | 3.0E-08 | 0.002        | Y              | group-specific component (vitamin D binding protein) |
| PRG3          | ENSG00000156575 | 5.74                         | -1.27   | 5.9E-14 | 0.000        | Y              | proteoglycan 3                                       |
| DUSP2         | ENSG00000158050 | 3.13                         | 1.79    | 3.4E-08 | 0.002        | Y              | dual specificity phosphatase 2                       |
| ALB           | ENSG00000163631 | 7.92                         | 1.80    | 3.6E-09 | 0.000        | Y              | albumin                                              |
| KBTBD6        | ENSG00000165572 | 1.69                         | 3.50    | 1.2E-07 | 0.007        | Y              | kelch repeat and BTB (POZ) domain containing 6       |
| WEE1          | ENSG00000166483 | 1.54                         | 2.52    | 1.5E-06 | 0.091        | Y              | WEE1 homolog (S. pombe)                              |
| DDIT4         | ENSG00000168209 | 2.02                         | 3.74    | 4.4E-07 | 0.026        | Y              | DNA-damage-inducible transcript 4                    |
| FGG           | ENSG00000171557 | 6.02                         | -1.45   | 2.1E-07 | 0.013        | Y              | fibrinogen gamma chain                               |
| FGB           | ENSG00000171564 | 7.08                         | -1.11   | 6.3E-08 | 0.004        | Y              | fibrinogen beta chain                                |
| SAA1          | ENSG00000173432 | 7.55                         | -1.02   | 5.7E-08 | 0.003        | Y              | serum amyloid A1                                     |
| HIST1H1B      | ENSG00000184357 | 1.92                         | 4.24    | 2.4E-06 | 0.147        | Y              | histone cluster 1, H1b                               |
| PRG2          | ENSG00000186652 | 4.96                         | 1.67    | 2.3E-08 | 0.001        | Y              | proteoglycan 2                                       |
| H1F0          | ENSG00000189060 | 1.73                         | 4.50    | 3.5E-06 | 0.212        | Y              | H1 histone family, member 0                          |
| HIST1H2AI     | ENSG00000196747 | 1.62                         | 3.86    | 3.4E-06 | 0.207        | Y              | histone cluster 1, H2ai                              |
| RNA5S9        | ENSG00000201321 | 5.54                         | -0.35   | 5.7E-08 | 0.003        | Y              | RNA, 5S ribosomal 9                                  |
| HIST2H3C      | ENSG00000203811 | 2.11                         | 3.88    | 9.1E-07 | 0.055        | Y              | histone cluster 2, H3c                               |
| RNU1-67P      | ENSG00000207175 | 3.94                         | 0.78    | 1.2E-08 | 0.001        | N              | NA                                                   |
| HMGB1P30      | ENSG00000244089 | 3.59                         | -2.84   | 5.2E-08 | 0.003        | Y              | high mobility group box 1 pseudogene 30              |
| RP11-1H15.1   | ENSG00000254765 | 3.83                         | -3.28   | 2.1E-06 | 0.125        | N              | NA                                                   |
| MRC1          | ENSG00000260314 | 3.55                         | 2.13    | 3.3E-08 | 0.002        | Y              | mannose receptor, C type 1                           |
| CTD-2033D15.2 | ENSG00000276107 | 3.32                         | -0.61   | 1.1E-08 | 0.001        | N              | NA                                                   |
| HIST1H4A      | ENSG00000278637 | 1.85                         | 0.24    | 1.0E-06 | 0.061        | Y              | histone cluster 1, H4a                               |

Table S3. Complete list of gene enriched in different processes in MODS as compared to CT at base line (0h).

| GO ids     | Description                                                                  | p.adjust | qvalue | geneID                               |
|------------|------------------------------------------------------------------------------|----------|--------|--------------------------------------|
| GO:0033003 | regulation of mast cell activation                                           | 0.005    | 0.003  | ADGRE2/FCER1G/PLSCR1                 |
| GO:0045088 | regulation of innate immune response                                         | 0.005    | 0.003  | IRAK3/PPARG/FCER1G/SOCS3/TLR5/PLSCR1 |
| GO:0043300 | regulation of leukocyte degranulation                                        | 0.005    | 0.003  | ADGRE2/FCER1G/CD177                  |
| GO:0097530 | granulocyte migration                                                        | 0.005    | 0.003  | ADGRE2/FCER1G/C3AR1/CD177            |
| GO:0002886 | regulation of myeloid leukocyte mediated immunity                            | 0.006    | 0.004  | ADGRE2/FCER1G/CD177                  |
| GO:0045576 | mast cell activation                                                         | 0.006    | 0.004  | ADGRE2/FCER1G/PLSCR1                 |
| GO:0002526 | acute inflammatory response                                                  | 0.006    | 0.004  | PPARG/FCER1G/C3AR1/PLSCR1            |
| GO:0002431 | Fc receptor mediated stimulatory signaling pathway                           | 0.011    | 0.007  | MYO10/FCER1G/PLSCR1                  |
| GO:0050727 | regulation of inflammatory response                                          | 0.011    | 0.007  | MM8/PPARG/FCER1G/C3AR1/SOCS3         |
| GO:0097529 | myeloid leukocyte migration                                                  | 0.011    | 0.007  | ADGRE2/FCER1G/C3AR1/CD177            |
| GO:0032868 | response to insulin                                                          | 0.020    | 0.013  | RETN/GRB10/PPARG/SOCS3               |
| GO:0043302 | positive regulation of leukocyte degranulation                               | 0.020    | 0.013  | FCER1G/CD177                         |
| GO:0002673 | regulation of acute inflammatory response                                    | 0.021    | 0.013  | PPARG/FCER1G/C3AR1                   |
| GO:0071404 | cellular response to low-density lipoprotein particle stimulus               | 0.021    | 0.013  | PPARG/FCER1G                         |
| GO:0072593 | reactive oxygen species metabolic process                                    | 0.021    | 0.013  | MM8/HK2/SH3PX2B/CD177                |
| GO:1990266 | neutrophil migration                                                         | 0.021    | 0.013  | FCER1G/C3AR1/CD177                   |
| GO:0060330 | regulation of response to interferon-gamma                                   | 0.021    | 0.013  | PPARG/SOCS3                          |
| GO:0060334 | regulation of interferon-gamma-mediated signaling pathway                    | 0.021    | 0.013  | PPARG/SOCS3                          |
| GO:0071621 | granulocyte chemotaxis                                                       | 0.021    | 0.013  | ADGRE2/FCER1G/C3AR1                  |
| GO:0043304 | regulation of mast cell degranulation                                        | 0.021    | 0.013  | ADGRE2/FCER1G                        |
| GO:0002888 | positive regulation of myeloid leukocyte mediated immunity                   | 0.021    | 0.013  | FCER1G/CD177                         |
| GO:0033006 | regulation of mast cell activation involved in immune response               | 0.021    | 0.013  | ADGRE2/FCER1G                        |
| GO:0032675 | regulation of interleukin-6 production                                       | 0.021    | 0.013  | IRAK3/MM8/FCER1G                     |
| GO:0050594 | response to lipoprotein particle                                             | 0.021    | 0.013  | PPARG/FCER1G                         |
| GO:0061082 | myeloid leukocyte cytokine production                                        | 0.021    | 0.013  | IRAK3/FCER1G                         |
| GO:0071402 | cellular response to lipoprotein particle stimulus                           | 0.022    | 0.014  | PPARG/FCER1G                         |
| GO:0032635 | interleukin-6 production                                                     | 0.022    | 0.014  | IRAK3/MM8/FCER1G                     |
| GO:0046627 | negative regulation of insulin receptor signaling pathway                    | 0.022    | 0.014  | GRB10/SOCS3                          |
| GO:1900077 | negative regulation of cellular response to insulin stimulus                 | 0.022    | 0.014  | GRB10/SOCS3                          |
| GO:1903305 | regulation of regulated secretory pathway                                    | 0.022    | 0.014  | ADGRE2/FCER1G/CD177                  |
| GO:0032680 | regulation of tumor necrosis factor production                               | 0.024    | 0.015  | IRAK3/MM8/FCER1G                     |
| GO:0032640 | tumor necrosis factor production                                             | 0.024    | 0.015  | IRAK3/MM8/FCER1G                     |
| GO:0002755 | MyD88-dependent toll-like receptor signaling pathway                         | 0.024    | 0.015  | IRAK3/TLR5                           |
| GO:1903555 | regulation of tumor necrosis factor superfamily cytokine production          | 0.024    | 0.015  | IRAK3/MM8/FCER1G                     |
| GO:0071706 | tumor necrosis factor superfamily cytokine production                        | 0.025    | 0.016  | IRAK3/MM8/FCER1G                     |
| GO:0045089 | positive regulation of innate immune response                                | 0.025    | 0.016  | IRAK3/FCER1G/TLR5/PLSCR1             |
| GO:0001959 | regulation of cytokine-mediated signaling pathway                            | 0.029    | 0.018  | IRAK3/PPARG/SOCS3                    |
| GO:1903532 | positive regulation of secretion by cell                                     | 0.029    | 0.018  | RETN/MM8/FCER1G/CD177                |
| GO:0043303 | mast cell degranulation                                                      | 0.029    | 0.018  | ADGRE2/FCER1G                        |
| GO:0002279 | mast cell activation involved in immune response                             | 0.029    | 0.019  | ADGRE2/FCER1G                        |
| GO:0002448 | mast cell mediated immunity                                                  | 0.030    | 0.019  | ADGRE2/FCER1G                        |
| GO:0002429 | immune response-activating cell surface receptor signaling pathway           | 0.030    | 0.019  | MYO10/FCER1G/C3AR1/PLSCR1            |
| GO:0060759 | regulation of response to cytokine stimulus                                  | 0.030    | 0.019  | IRAK3/PPARG/SOCS3                    |
| GO:0006911 | phagocytosis, engulfment                                                     | 0.030    | 0.019  | PPARG/FCER1G                         |
| GO:0043434 | response to peptide hormone                                                  | 0.031    | 0.019  | RETN/GRB10/PPARG/SOCS3               |
| GO:1903307 | positive regulation of regulated secretory pathway                           | 0.031    | 0.019  | FCER1G/CD177                         |
| GO:0051047 | positive regulation of secretion                                             | 0.031    | 0.019  | RETN/MM8/FCER1G/CD177                |
| GO:2000377 | regulation of reactive oxygen species metabolic process                      | 0.031    | 0.020  | MM8/HK2/CD177                        |
| GO:0009612 | response to mechanical stimulus                                              | 0.031    | 0.020  | RETN/PPARG/TLR5                      |
| GO:0017157 | regulation of exocytosis                                                     | 0.033    | 0.021  | ADGRE2/FCER1G/CD177                  |
| GO:0032653 | regulation of interleukin-10 production                                      | 0.034    | 0.021  | MM8/FCER1G                           |
| GO:0050900 | leukocyte migration                                                          | 0.034    | 0.021  | ADGRE2/FCER1G/C3AR1/CD177            |
| GO:0032613 | interleukin-10 production                                                    | 0.034    | 0.021  | MM8/FCER1G                           |
| GO:0046626 | regulation of insulin receptor signaling pathway                             | 0.034    | 0.021  | GRB10/SOCS3                          |
| GO:0009024 | plasma membrane invagination                                                 | 0.034    | 0.021  | PPARG/FCER1G                         |
| GO:0032869 | cellular response to insulin stimulus                                        | 0.034    | 0.021  | GRB10/PPARG/SOCS3                    |
| GO:0001960 | negative regulation of cytokine-mediated signaling pathway                   | 0.034    | 0.021  | IRAK3/PPARG                          |
| GO:0045824 | negative regulation of innate immune response                                | 0.035    | 0.022  | IRAK3/PPARG                          |
| GO:0043388 | positive regulation of DNA binding                                           | 0.035    | 0.022  | MM8/PPARG                            |
| GO:1900076 | regulation of cellular response to insulin stimulus                          | 0.035    | 0.022  | GRB10/SOCS3                          |
| GO:0034394 | protein localization to cell surface                                         | 0.035    | 0.022  | FCER1G/CD177                         |
| GO:0046324 | regulation of glucose import                                                 | 0.035    | 0.022  | GRB10/HK2                            |
| GO:0060761 | negative regulation of response to cytokine stimulus                         | 0.035    | 0.022  | IRAK3/PPARG                          |
| GO:0045444 | fat cell differentiation                                                     | 0.037    | 0.023  | RETN/PPARG/SH3PX2B                   |
| GO:0045600 | positive regulation of fat cell differentiation                              | 0.037    | 0.023  | PPARG/SH3PX2B                        |
| GO:0031348 | negative regulation of defense response                                      | 0.037    | 0.023  | IRAK3/PPARG/SOCS3                    |
| GO:0010324 | membrane invagination                                                        | 0.038    | 0.024  | PPARG/FCER1G                         |
| GO:0032418 | lysosome localization                                                        | 0.038    | 0.024  | ADGRE2/FCER1G                        |
| GO:0030595 | leukocyte chemotaxis                                                         | 0.039    | 0.025  | ADGRE2/FCER1G/C3AR1                  |
| GO:0046323 | glucose import                                                               | 0.042    | 0.026  | GRB10/HK2                            |
| GO:0006909 | phagocytosis                                                                 | 0.047    | 0.030  | PPARG/MYO10/FCER1G                   |
| GO:0006801 | superoxide metabolic process                                                 | 0.048    | 0.031  | SH3PX2B/CD177                        |
| GO:0038094 | Fc-gamma receptor signaling pathway                                          | 0.048    | 0.031  | MYO10/FCER1G                         |
| GO:0050766 | positive regulation of phagocytosis                                          | 0.048    | 0.031  | PPARG/FCER1G                         |
| GO:0010827 | regulation of glucose transmembrane transport                                | 0.049    | 0.031  | GRB10/HK2                            |
| GO:0045921 | positive regulation of exocytosis                                            | 0.051    | 0.032  | FCER1G/CD177                         |
| GO:0034121 | regulation of toll-like receptor signaling pathway                           | 0.052    | 0.033  | IRAK3/TLR5                           |
| GO:0032760 | positive regulation of tumor necrosis factor production                      | 0.053    | 0.033  | MM8/FCER1G                           |
| GO:0002758 | innate immune response-activating signal transduction                        | 0.053    | 0.033  | IRAK3/FCER1G/TLR5                    |
| GO:0051348 | negative regulation of transferase activity                                  | 0.054    | 0.034  | IRAK3/PPARG/SOCS3                    |
| GO:1903557 | positive regulation of tumor necrosis factor superfamily cytokine production | 0.054    | 0.034  | MM8/FCER1G                           |
| GO:0002703 | regulation of leukocyte mediated immunity                                    | 0.054    | 0.034  | ADGRE2/FCER1G/CD177                  |
| GO:0002718 | regulation of cytokine production involved in immune response                | 0.054    | 0.034  | IRAK3/FCER1G                         |
| GO:0002699 | positive regulation of immune effector process                               | 0.054    | 0.034  | ADGRE2/FCER1G/CD177                  |
| GO:0030100 | regulation of endocytosis                                                    | 0.054    | 0.034  | PPARG/FCER1G/CD177                   |
| GO:0022617 | extracellular matrix disassembly                                             | 0.054    | 0.034  | MM8/SH3PX2B                          |
| GO:0032755 | positive regulation of interleukin-6 production                              | 0.055    | 0.036  | MM8/FCER1G                           |
| GO:0002218 | activation of innate immune response                                         | 0.057    | 0.036  | IRAK3/FCER1G/TLR5                    |
| GO:1990823 | response to leukemia inhibitory factor                                       | 0.059    | 0.037  | HK2/SOCS3                            |
| GO:1990830 | cellular response to leukemia inhibitory factor                              | 0.059    | 0.037  | HK2/SOCS3                            |
| GO:0071375 | cellular response to peptide hormone stimulus                                | 0.064    | 0.040  | GRB10/PPARG/SOCS3                    |
| GO:0050764 | regulation of phagocytosis                                                   | 0.066    | 0.042  | PPARG/FCER1G                         |
| GO:0060326 | cell chemotaxis                                                              | 0.067    | 0.042  | ADGRE2/FCER1G/C3AR1                  |
| GO:0007229 | integrin-mediated signaling pathway                                          | 0.069    | 0.043  | FCER1G/CD177                         |
| GO:0071496 | cellular response to external stimulus                                       | 0.069    | 0.043  | PPARG/UPP1/TLR5                      |
| GO:0002367 | cytokine production involved in immune response                              | 0.069    | 0.044  | IRAK3/FCER1G                         |
| GO:1904659 | glucose transmembrane transport                                              | 0.069    | 0.044  | GRB10/HK2                            |
| GO:0032103 | positive regulation of response to external stimulus                         | 0.069    | 0.044  | MM8/FCER1G/C3AR1                     |
| GO:0030593 | neutrophil chemotaxis                                                        | 0.071    | 0.045  | FCER1G/C3AR1                         |
| GO:0007596 | blood coagulation                                                            | 0.072    | 0.046  | FCER1G/PLSCR1/CD177                  |
| GO:2000379 | positive regulation of reactive oxygen species metabolic process             | 0.072    | 0.046  | MM8/CD177                            |
| GO:0032963 | collagen metabolic process                                                   | 0.072    | 0.046  | MM8/PPARG                            |
| GO:0002696 | positive regulation of leukocyte activation                                  | 0.072    | 0.046  | MM8/FCER1G/CD177                     |
| GO:0007599 | hemostasis                                                                   | 0.072    | 0.046  | FCER1G/PLSCR1/CD177                  |
| GO:0050817 | coagulation                                                                  | 0.072    | 0.046  | FCER1G/PLSCR1/CD177                  |
| GO:0008945 | hexose transmembrane transport                                               | 0.072    | 0.046  | GRB10/HK2                            |
| GO:0015749 | monosaccharide transmembrane transport                                       | 0.074    | 0.047  | GRB10/HK2                            |
| GO:0034219 | carbohydrate transmembrane transport                                         | 0.075    | 0.048  | GRB10/HK2                            |
| GO:0050867 | positive regulation of cell activation                                       | 0.075    | 0.048  | MM8/FCER1G/CD177                     |
| GO:0032368 | regulation of lipid transport                                                | 0.079    | 0.050  | RETN/PPARG                           |
| GO:1901653 | cellular response to peptide                                                 | 0.079    | 0.050  | GRB10/PPARG/SOCS3                    |
| GO:0045765 | regulation of angiogenesis                                                   | 0.083    | 0.052  | PPARG/HK2/C3AR1                      |
| GO:0038093 | Fc receptor signaling pathway                                                | 0.083    | 0.052  | MYO10/FCER1G                         |

Table S4. Complete list of gene enriched in different processes in ECMO as compared to MODS at base line (0h).

| GO Id      | Description                                           | p.adjust | qvalue | geneID                                   |
|------------|-------------------------------------------------------|----------|--------|------------------------------------------|
| GO:0006342 | chromatin silencing                                   | 0.00     | 0.00   | HIST1H1B/H1F0/HIST2H3C/HIST2H3A/HIST1H4A |
| GO:0060968 | regulation of gene silencing                          | 0.00     | 0.00   | HIST1H1B/H1F0/HIST2H3C/HIST2H3A/HIST1H4A |
| GO:0045814 | negative regulation of gene expression, epigenetic    | 0.00     | 0.00   | HIST1H1B/H1F0/HIST2H3C/HIST2H3A/HIST1H4A |
| GO:0006334 | nucleosome assembly                                   | 0.00     | 0.00   | HIST1H1B/H1F0/HIST2H3C/HIST2H3A/HIST1H4A |
| GO:0031497 | chromatin assembly                                    | 0.00     | 0.00   | HIST1H1B/H1F0/HIST2H3C/HIST2H3A/HIST1H4A |
| GO:0061045 | negative regulation of wound healing                  | 0.00     | 0.00   | APOH/APCS/FGG/FGB                        |
| GO:0007596 | blood coagulation                                     | 0.00     | 0.00   | APOH/FGG/FGB/SAA1/HIST2H3C/HIST2H3A      |
| GO:0031639 | plasminogen activation                                | 0.00     | 0.00   | APOH/FGG/FGB                             |
| GO:0034728 | nucleosome organization                               | 0.00     | 0.00   | HIST1H1B/H1F0/HIST2H3C/HIST2H3A/HIST1H4A |
| GO:0007599 | hemostasis                                            | 0.00     | 0.00   | APOH/FGG/FGB/SAA1/HIST2H3C/HIST2H3A      |
| GO:0050817 | coagulation                                           | 0.00     | 0.00   | APOH/FGG/FGB/SAA1/HIST2H3C/HIST2H3A      |
| GO:1903035 | negative regulation of response to wounding           | 0.00     | 0.00   | APOH/APCS/FGG/FGB                        |
| GO:0006333 | chromatin assembly or disassembly                     | 0.00     | 0.00   | HIST1H1B/H1F0/HIST2H3C/HIST2H3A/HIST1H4A |
| GO:0072378 | blood coagulation, fibrin clot formation              | 0.00     | 0.00   | APOH/FGG/FGB                             |
| GO:0042730 | fibrinolysis                                          | 0.00     | 0.00   | APOH/FGG/FGB                             |
| GO:0006323 | DNA packaging                                         | 0.00     | 0.00   | HIST1H1B/H1F0/HIST2H3C/HIST2H3A/HIST1H4A |
| GO:0072376 | protein activation cascade                            | 0.00     | 0.00   | APOH/APCS/FGG/FGB                        |
| GO:0000183 | chromatin silencing at rDNA                           | 0.00     | 0.00   | HIST2H3C/HIST2H3A/HIST1H4A               |
| GO:0065004 | protein-DNA complex assembly                          | 0.00     | 0.00   | HIST1H1B/H1F0/HIST2H3C/HIST2H3A/HIST1H4A |
| GO:0002576 | platelet degranulation                                | 0.00     | 0.00   | APOH/ALB/FGG/FGB                         |
| GO:0061041 | regulation of wound healing                           | 0.00     | 0.00   | APOH/APCS/FGG/FGB                        |
| GO:0071103 | DNA conformation change                               | 0.00     | 0.00   | HIST1H1B/H1F0/HIST2H3C/HIST2H3A/HIST1H4A |
| GO:0030195 | negative regulation of blood coagulation              | 0.00     | 0.00   | APOH/FGG/FGB                             |
| GO:1900047 | negative regulation of hemostasis                     | 0.00     | 0.00   | APOH/FGG/FGB                             |
| GO:0071824 | protein-DNA complex subunit organization              | 0.00     | 0.00   | HIST1H1B/H1F0/HIST2H3C/HIST2H3A/HIST1H4A |
| GO:0031638 | zymogen activation                                    | 0.00     | 0.00   | APOH/FGG/FGB                             |
| GO:0050819 | negative regulation of coagulation                    | 0.00     | 0.00   | APOH/FGG/FGB                             |
| GO:1903034 | regulation of response to wounding                    | 0.00     | 0.00   | APOH/APCS/FGG/FGB                        |
| GO:0032102 | negative regulation of response to external stimulus  | 0.00     | 0.00   | APOH/APCS/FGG/FGB/SAA1                   |
| GO:0030193 | regulation of blood coagulation                       | 0.00     | 0.00   | APOH/FGG/FGB                             |
| GO:0045652 | regulation of megakaryocyte differentiation           | 0.00     | 0.00   | HIST2H3C/HIST2H3A/HIST1H4A               |
| GO:1900046 | regulation of hemostasis                              | 0.00     | 0.00   | APOH/FGG/FGB                             |
| GO:0050818 | regulation of coagulation                             | 0.00     | 0.00   | APOH/FGG/FGB                             |
| GO:0016584 | nucleosome positioning                                | 0.00     | 0.00   | HIST1H1B/H1F0                            |
| GO:0060964 | regulation of gene silencing by miRNA                 | 0.00     | 0.00   | HIST2H3C/HIST2H3A/HIST1H4A               |
| GO:0060147 | regulation of posttranscriptional gene silencing      | 0.00     | 0.00   | HIST2H3C/HIST2H3A/HIST1H4A               |
| GO:0060966 | regulation of gene silencing by RNA                   | 0.00     | 0.00   | HIST2H3C/HIST2H3A/HIST1H4A               |
| GO:0030219 | megakaryocyte differentiation                         | 0.00     | 0.00   | HIST2H3C/HIST2H3A/HIST1H4A               |
| GO:0031936 | negative regulation of chromatin silencing            | 0.00     | 0.00   | HIST1H1B/H1F0                            |
| GO:0051004 | regulation of lipoprotein lipase activity             | 0.01     | 0.00   | APOH/APOC1                               |
| GO:0045637 | regulation of myeloid cell differentiation            | 0.01     | 0.00   | APCS/HIST2H3C/HIST2H3A/HIST1H4A          |
| GO:0034375 | high-density lipoprotein particle remodeling          | 0.01     | 0.00   | APOC1/ALB                                |
| GO:0006898 | receptor-mediated endocytosis                         | 0.01     | 0.01   | APOC1/ALB/SAA1/MRC1                      |
| GO:0031935 | regulation of chromatin silencing                     | 0.01     | 0.01   | HIST1H1B/H1F0                            |
| GO:0034116 | positive regulation of heterotypic cell-cell adhesion | 0.01     | 0.01   | FGG/FGB                                  |
| GO:0038111 | interleukin-7-mediated signaling pathway              | 0.01     | 0.01   | HIST2H3C/HIST2H3A                        |
| GO:0045907 | positive regulation of vasoconstriction               | 0.01     | 0.01   | FGG/FGB                                  |
| GO:0098760 | response to interleukin-7                             | 0.01     | 0.01   | HIST2H3C/HIST2H3A                        |
| GO:0098761 | cellular response to interleukin-7                    | 0.01     | 0.01   | HIST2H3C/HIST2H3A                        |
